# 1 Role of 5-HT<sub>2C</sub> receptors in zebrafish

## 2 alarm reactions and post-exposure

### 3 behavior

4 Rhayra Xavier do Carmo Silva<sup>1,2</sup>, Bianca Gomes do Nascimento<sup>2</sup>, Suianny Nayara da Silva

5 Chaves<sup>2</sup>, Anderson Manoel Herculano<sup>1</sup>, Monica Lima-Maximino<sup>3</sup>, Caio Maximino<sup>2\*</sup>

6 <sup>1</sup> Laboratório de Neurofarmacologia Experimental – LNE, Universidade Federal do Pará, Belém/  
7 PA, Brazil

8 <sup>2</sup> Laboratório de Neurociências e Comportamento “Frederico Guilherme Graeff” – LaNeC,  
9 Universidade Federal do Sul e Sudeste do Pará, Marabá/PA, Brazil

10 <sup>3</sup> Laboratório de Neurofarmacologia e Biofísica – LaNeF, Universidade do Estado do Pará,  
11 Marabá/PA, Brazil

12

13 \* Corresponding author

14 Caio Maximino

15 Laboratório de Neurociências e Comportamento “Frederico Guilherme Graeff” - LaNeC

16 Faculdade de Psicologia, Instituto de Estudos em Saúde e Biológicas

17 Universidade Federal do Sul e Sudeste do Pará, Campus Marabá, Unidade III

18 Av. dos Ipês, S/N – 68500-000

19 Marabá/PA, Brazil

20 [cmaximino@unifesspa.edu.br](mailto:cmaximino@unifesspa.edu.br)

## 21 Abstract

22 Serotonin (5-HT) receptors have been implicated in responses to aversive stimuli in mammals  
23 and fish, but its precise role is still unknown. Moreover, since at least seven families of 5-HT  
24 receptors exist in vertebrates, the role of specific receptors is still debated. Aversive stimuli can  
25 be classified as indicators of proximal, distal, or potential threat, initiating responses that are  
26 appropriate for each of these threat levels. Responses to potential threat usually involve  
27 cautious exploration and increased alertness, while responses to distal and proximal threat  
28 involve a fight-flight-freeze reaction. We exposed adult zebrafish to a conspecific alarm  
29 substance (CAS) and observed behavior during (distal threat) and after (proximal threat)  
30 exposure, and treated with the 5-HT<sub>2C</sub> receptor agonists MK-212 or WAY-161503 or with the  
31 antagonist RS-102221. The agonists blocked CAS-elicited defensive behavior (distal threat), but  
32 not post-exposure increases in defensive behavior (potential threat), suggesting a phasic  
33 inhibition of responses to distal threat. MK-212 did not block changes in behavior elicited by  
34 acute restraint stress, a model of proximal threat, suggesting that the phasic role of the 5-HT<sub>2C</sub>  
35 receptor is specific to distal threat. We also found that RS-10221, a 5-HT<sub>2C</sub> receptor antagonist,  
36 did not change behavior during exposure, but it produced a small effect on behavior after  
37 exposure to CAS, suggesting a tonic facilitation of responses to potential threat.

38 **Keywords:** 5-HT<sub>2C</sub> receptors; Anxiety; Fear; Responses to threat; Zebrafish

## 39 1. Introduction

40 Serotonergic mechanisms have been implicated in defensive behavior to distal, proximal  
41 and potential threat (Graeff, 2004). In current interpretations of the role of serotonin (5-HT) on  
42 neurobehavioral responses to threat, the neurotransmitter is released when threat is potential,

43 increasing defensive behavior at this level (i.e., risk assessment/anxiety-like behavior), but  
44 inhibiting (non-adaptive) responses to distal and proximal threat (i.e., fight-flight-freeze/fear-like  
45 behavior)(Graeff, 2004). These effects are mediated by different structures of the neuroaxis,  
46 with more rostral structures (e.g., limbic forebrain) mediating responses to potential threat, and  
47 more caudal structures (e.g., periaqueductal gray/griseum centrale) mediating responses to  
48 distal and proximal threat (Graeff, 2004).

49 In zebrafish (*Danio rerio* Hamilton 1822), the alarm reaction has been proposed as a  
50 model to study defenses to distal threat (Maximino et al., 2019). The alarm reaction is a  
51 behavioral response to the release of an alarm substance (“Schreckstoff”) from epithelial club  
52 cells after damage (von Frisch, 1938), and involves strategies to avoid potential predators.  
53 Since the most likely situation for club cells to be damaged in the wild is predator attack,  
54 conspecific alarm substance (CAS) communicates to shoal-mates the potential presence of a  
55 predator, eliciting responses that avoid predator attack (Maximino et al., 2019). During CAS  
56 exposure, zebrafish display erratic swimming and bottom-dwelling, while after CAS exposure  
57 freezing is prominent (Lima-Maximino et al., 2020; Nathan et al., 2015). We suggested that the  
58 first component involves defenses to distal threat (“fear-like behavior”), while the second  
59 component involves a “return to normal” that is related to potential threat (“anxiety-like  
60 behavior”)(Lima-Maximino et al., 2020; Maximino et al., 2019).

61 5-HT has been implicated in fish behavioral responses both during and after exposure to  
62 CAS. In zebrafish, extracellular 5-HT levels were increased after CAS exposure (Maximino et  
63 al., 2014), an effect that can be related to decreased 5-HT uptake (Maximino et al., 2014) and/or  
64 decreased monoamine oxidase activity (Lima-Maximino et al., 2020; Quadros et al., 2018). In  
65 Crucian carp (*Carassius carassius*), exposure to CAS elicits increases in serotonergic activity in  
66 the brainstem and optic tectum (Höglund et al., 2005), structures which have been involved in  
67 responses to distal and proximal threat (do Carmo Silva et al., 2018a). However, this only

68 happened when hiding material was unavailable in the tank. In Nile tilapia (*Oreochromis*  
69 *niloticus*), CAS did not increase serotonergic activity in the dorsomedial and dorsolateral  
70 telencephali (Silva et al., 2015), homologues of the frontotemporal amygdaloid nuclei and  
71 hippocampus, respectively (do Carmo Silva et al., 2018a). These results suggest that, during or  
72 after exposure, CAS increases serotonergic activity in regions associated with “quick-and-dirty”  
73 behavioral responses to distal threat (a “fight/flight/freeze” or “fear” system), but not in the  
74 telencephalic areas associated with cautious exploration/risk assessment (a “behavioral  
75 inhibition” or “anxiety” system).

76 Manipulations of the serotonergic system impact behavioral and neurovegetative  
77 responses to CAS. Treating zebrafish with acute fluoxetine, therefore increasing serotonergic  
78 activity, dose-dependently decreased behavior during exposure, but increased post-exposure  
79 freezing (Lima-Maximino et al., 2020). Blocking 5-HT receptors with metergoline, or depleting 5-  
80 HT with *para*-chlorophenylalanine, had no effect on behavior during exposure, but blocked the  
81 effects of CAS on post-exposure behavior. While we suggested that the serotonergic system is  
82 recruited *after* CAS exposure to inhibit fear-like responses and promote a cautious “return to  
83 normal” (Lima-Maximino et al., 2020), results from Crucian carp (Höglund et al., 2005) open the  
84 possibility that inescapability is the variable that is involved in this activation of the serotonergic  
85 system.

86 The role of serotonin receptors from the 5-HT<sub>2</sub> family in CAS-elicited behavioral  
87 adjustments has also been investigated. Zebrafish has been shown to possess two copies of  
88 the 5-HT<sub>2A</sub> receptor, one copy of the 5-HT<sub>2B</sub> receptor, and two copies of the 5-HT<sub>2C</sub> receptor  
89 (Sourbron et al., 2016). In Nile tilapia, mianserin, a 5-HT<sub>2A</sub> and 5-HT<sub>2C</sub> receptor antagonist that  
90 also blocks  $\alpha_2$ -adrenoceptors, blocked active components of the alarm reaction (dashing,  
91 bristling of dorsal fin spines), but not freezing, during exposure (Barreto, 2012). In zebrafish,  
92 methysergide (an antagonist at 5-HT<sub>2A</sub>, 2B, and 2C receptors, and a 5-HT<sub>1A</sub> receptor agonist)

93 increased freezing and bottom-dwelling during and after exposure at a high dose (92.79 mg/kg),  
94 but not at lower doses (Nathan et al., 2015). These results point to an inhibitory role of the 5-  
95 HT<sub>2A</sub> and 5-HT<sub>2C</sub> receptors on CAS-elicited fear-like responses. However, since Nathan et al.  
96 (2015) observed these effects consistently during a long session, in which behavior is expected  
97 to change as CAS concentrations decrease (Mathuru et al., 2012)(i.e., similar to the shift from  
98 erratic swimming to freezing that is observed when animals are observed after exposure in a  
99 CAS-free context; Lima-Maximino et al., 2020), and since serotonergic drugs can produce  
100 opposite effects on behavior during and after CAS exposure (Lima-Maximino et al., 2020), from  
101 these results it is not possible to understand whether 5-HT<sub>2</sub> receptors participate in both  
102 responses.

103         These results are also complicated by results from rodent work. 5-HT<sub>2</sub> receptors have  
104 been implicated in the mechanisms of defensive behavior organized by the central gray  
105 (PAG/GC) and amygdala in rats. At different amygdalar subnuclei, 5-HT<sub>2</sub> receptors appear to  
106 either facilitate (de Paula and Leite-Panissi, 2016) or block (Macedo et al., 2007) unconditioned  
107 fear, while at the midbrain 5-HT<sub>2</sub> receptors inhibit defensive responses to distal and proximal  
108 threat (Castilho et al., 2002; Castilho and Brandão, 2001; Coimbra and Brandão, 1997; Graeff et  
109 al., 1986; Oliveira et al., 2007). These receptors have also been implicated in anxiety-like  
110 behavior (defense to potential threat), facilitating these responses in the amygdala (Cornélio  
111 and Nunes-de-Souza, 2007), hippocampus (Alves et al., 2004), and GC/PAG (Nunes-de-Souza  
112 et al., 2008) of rodents. In general, the 5-HT<sub>2C</sub> receptor appears to mediate these effects on  
113 anxiety-like behavior. Thus, in rodents 5-HT<sub>2</sub> receptors appear to inhibit fear and facilitate  
114 anxiety at different levels of the neuroaxis, while in zebrafish these receptors appear to inhibit  
115 both fear and anxiety, although it is currently unknown which brain regions participate in each  
116 effect.

117         These differences could be due to species differences; to effects at different receptors

118 (e.g., 5-HT<sub>2A</sub> or 5-HT<sub>2C</sub>); or to difficulties in the protocol used by Nathan et al. (2015), which does  
119 not differentiate between responses to proximal, distal, or potential threat. In this work, we  
120 tested whether 5-HT<sub>2C</sub> receptors participate in responses to CAS during (distal threat) or after  
121 exposure (potential threat) and to acute restraint stress (ARS). ARS has been applied in  
122 zebrafish to elicit strong stress responses, including activation of the hypothalamus-pituitary-  
123 interrenal (HPI) axis and associated behavioral responses (Assad et al., 2020; Ghisleni et al.,  
124 2012; Piato et al., 2011). From the point of view of the predatory imminence continuum theory,  
125 ARS represents proximal threat (Perusini and Fanselow, 2015). Thus, if 5-HT<sub>2C</sub> receptors inhibit  
126 aversively motivated behavior in zebrafish regardless of threat distance, its activation would  
127 inhibit behavioral responses at these three contexts. If, as in rodents, 5-HT<sub>2C</sub> receptors act at  
128 different levels of threat distance to either activate or inhibit defensive responses, then 5-HT<sub>2C</sub>  
129 agonists will not produce the same effect in each of these contexts.

130 A related question is whether 5-HT<sub>2C</sub> receptors possess a “tonic” role in defensive  
131 behavior in zebrafish. Differently from phasic responses, which are temporally and spatially  
132 coupled to neurotransmitter release, tonic responses result from low-level, persistent, and  
133 extrasynaptic activation of receptors (Daw et al., 2002). There is some evidence for a  
134 serotonergic tone in zebrafish. Tonic optogenetic activation of a habenulo-raphé pathway in  
135 zebrafish is aversive, inducing avoidance conditioning, and presentation of a conditioned  
136 stimulus consistently produces this tonic activation (Amo et al., 2014); this tonic activity has  
137 been proposed to represent a negative expectation value, with phasic signals representing  
138 prediction error (Amo et al., 2014; Daw et al., 2002). We have shown that there is evidence for a  
139 tonic facilitation of defensive behavior after CAS exposure, but not during exposure, as  
140 metergoline and pCPA blocked the first but not the latter (Lima-Maximino et al., 2020).  
141 Interestingly, work with rodents clearly suggests phasic facilitation or inhibition of defensive  
142 responses by 5-HT<sub>2C</sub> receptors, since agonists, but not antagonists, produce these effects.

143           The aim of the present work was to test the hypothesis that phasic activation of 5-HT<sub>2C</sub>  
144 receptors would block CAS-elicited defensive reactions during exposure, but not after exposure;  
145 moreover, we proposed a tonic facilitation of post-exposure behavior. We also hypothesized  
146 that 5-HT<sub>2C</sub> agonists would not alter the anxiogenic-like effects of acute restraint stress (ARS), a  
147 model for proximal threat. We found that 5-HT<sub>2C</sub> agonists were able to block elements of the  
148 alarm reaction, but did not affect post-exposure behavior, nor the anxiogenic-like effects of ARS.  
149 This manuscript is a complete report of all the studies performed to test the effect of 5-HT<sub>2C</sub>  
150 agonists and antagonists on zebrafish defensive behavior to distal threat. We report how the  
151 sample size was determined, all data exclusions (if any), all manipulations, and all measures in  
152 the study.

153

## 154 2. Materials and methods

### 155 2.1. Animals and housing

156           Adult (>4 month-old; standard length = 23.0 ± 3.2 mm) zebrafish (*Danio rerio*) from the  
157 longfin phenotype (n = 218) were used in the present experiments. The populations used are  
158 expected to better represent the natural populations in the wild, due to its heterogeneous  
159 genetic background (Parra et al., 2009; Speedie and Gerlai, 2008). Animals were bought from a  
160 commercial vendor (Belém/PA) and collectively maintained in 40 L tanks for at least two weeks  
161 before the onset of experiments. The animals were fed daily with fish flakes. The tanks were  
162 kept at constant temperature (28 °C), oxygenation, light cycle (14:10 LD photoperiod) and a pH  
163 of 7.0-8.0, according to standards of care for zebrafish (Lawrence, 2007). Animals were used for  
164 only one experiment to reduce interference from apparatus exposure. Potential suffering of

165 animals was minimized by controlling for the aforementioned environmental variables.  
166 Furthermore, in the all experiments the animals used were handled, anesthetized and sacrificed  
167 according to the norms of the Brazilian Guideline for the Care and Use of Animals for Scientific  
168 and Didactical Purposes (Conselho Nacional de Controle de Experimentação Animal -  
169 CONCEA, 2017). The experimental protocols were approved by UEPA's IACUC under protocol  
170 06/18.

171

## 172 2.2. Drugs and treatments

173 The 5-HT<sub>2C</sub> receptor agonists MK-2212 (2-Chloro-6-(1-piperazinyl)pyrazine, CAS  
174 #64022-27-1) and WAY-161503 (8,9-dichloro-2,3,4,4a-tetrahydro-1H-pyrazino[1,2-a]quinoxalin-  
175 5(6H)-one; CAS #75704-24-4) were bought from Sigma-Aldrich (St Louis, USA) on 2018, and  
176 dissolved in Cortland's salt solution (NaCl 124.1 mM, KCl 5.1 mM, Na<sub>2</sub>HPO<sub>4</sub> 2.9 mM, MgSO<sub>4</sub> 1.9  
177 mM, CaCl<sub>2</sub> 1.4 mM, NaHCO<sub>3</sub> 11.9 mM, Polyvinylpyrrolidone 4%, 1,000 USP units Heparin; Wolf,  
178 1963) and in 1% dimethyl sulfoxide (DMSO), respectively. The 5-HT<sub>2C</sub> receptor antagonist RS-  
179 102221 (8-[5-(2,4-Dimethoxy-5-(4-trifluoromethylphenylsulphonamido)phenyl -5-oxopentyl]-  
180 1,3,8-triazaspiro[4.5]decane-2,4-dione; CAS #185376-97-0) was bought from Sigma-Aldrich (St  
181 Louis, USA) in 2018, and dissolved in 1% DMSO. While affinities for zebrafish 5-HT<sub>2C</sub>-like  
182 receptors have not been established, WAY-161503 has been reported to displace DOI from  
183 human 5-HT<sub>2C</sub> receptors with a  $K_i$  of 3.3 nM (6-fold selectivity over human 5-HT<sub>2A</sub> receptors and  
184 20-fold over human 5-HT<sub>2B</sub> receptors)(Rosenzweig-Lipson et al., 2006). MK-212 has been  
185 shown to be less selective at recombinant human receptors, with a  $K_i$  of 7.01 nM at 5-HT<sub>2C</sub>  
186 receptors (vs. 5.99 nM and 6.21 nM at 5-HT<sub>2A</sub> and 5-HT<sub>2B</sub> receptors, respectively)(Knight et al.,  
187 2004). Finally, RS-102221 has been shown to displace mesulergine from human 5-HT<sub>2C</sub>



188 receptor with a  $pKi$  of 8.4 nM (over 100-fold selectivity over human 5-HT<sub>2A</sub> and 5-HT<sub>2B</sub> receptors)  
189 (Bonhaus et al., 1997).

190 For Experiment 1, animals were injected intraperitoneally either with MK-212 (1 mg/kg  
191 and 2 mg/kg, doses which increase anxiety-like behavior in the rat elevated plus-maze; (de  
192 Mello Cruz et al., 2005)) or with the vehicle solution (Cortland's salt solution); WAY-161503 (1  
193 mg/kg, a dose which produces anxiogenic-like effects in the rat elevated plus-maze: Gomes et  
194 al., 2010) or with the vehicle solution (DMSO); or RS-102221 (2 mg/kg, a dose that reduces  
195 anxiety in the mouse light/dark test; (Kuznetsova et al., 2006)). For Experiment 2, animals were  
196 injected intraperitoneally with MK-212 (2 mg/kg) or vehicle (Cortland's salt solution). Injections  
197 were made according to the protocol proposed by Kinkel et al. (2010); briefly, animals were  
198 cold-anesthetized and transferred to a sponge-based surgical bed, in which injection was made.  
199 Injections were made using a microsyringe (Hamilton® 701N syringe, needle size 26 gauge at  
200 cone tip), with total volumes of injection of 5  $\mu$ L.

201

## 202 2.3. Effects of 5-HT<sub>2C</sub> receptor agonists and antagonists on alarm 203 reaction and post-exposure behavior

### 204 2.3.1. Experimental design

205 To verify the effects of phasic activation of 5-HT<sub>2C</sub> receptors on the zebrafish alarm  
206 reaction, animals were pre-treated with either receptor agonists and exposed to CAS in a  
207 sequential design, with a "washout" period in between tests (Figure 1A). For the exposure  
208 stage, each animal was transferred individually to a container (2 L) where after 3 minutes of  
209 acclimatization, it was carefully exposed to 7 ml of alarm substance (CAS), extracted using a

210 standardized protocol (do Carmo Silva et al., 2018b). As negative control, a group with the  
211 same amount of animals was exposed to the same volume of distilled water, according to the  
212 protocol of Lima-Maximino et al. (2020). The animals remained exposed for 6 minutes during  
213 which their behavior was recorded using a video camera positioned in front of the aquarium.  
214 Then, to verify the residual effects of exposure to the alarm substance, the animals were  
215 transferred to the apparatus of the novel tank test, a transparent glass aquarium filled with 5 L of  
216 mineral water where the animal can freely explore the space for a period 6 minutes during which  
217 their behavior was recorded, following the protocol described in Lima-Maximino et al., (2020).  
218 All stages of the experiment were performed under constant white Gaussian noise, producing  
219 an average of 58 dB above the tank. Light levels above the tanks were measured using a  
220 handheld light meter, and ranged from 251 to 280 lumens (coefficient of variation = 3.399%  
221 between subjects).

222         Animals were randomly allocated to groups using a random number 185 generator  
223 ([http://www.jerrydallal.com/random/random\\_block\\_size\\_r.htm](http://www.jerrydallal.com/random/random_block_size_r.htm)), with each subject randomized to  
224 a single treatment using random permuted blocks. One PI attributed a random letter to  
225 treatment (e.g., “A” for CTRL, “B” for CAS) and a random integer for drug dose (e.g., “1” for 1  
226 mg/kg, “2” for 0 mg/kg [vehicle]), and combinations for letters and integers were randomized.  
227 For each experiment, animals were treated and tested in the order of allocation (i.e., randomly).  
228 In all experiments, experimenters and data analysts were blinded to drugs and treatment by  
229 using coded vials (with the same code used for randomization); blinding was removed only after  
230 data analysis. Experiments were always run between 08:00AM and 02:00 PM. After  
231 experiments, animals were sacrificed by prolonged bath in ice-cold water (< 12 °C), followed by  
232 spinal transection (Matthews and Varga, 2012).

233

### 234 2.3.2. Sample size determination

235 To determine sample size, we incorporated information from control groups derived from  
236 previously published experiments on zebrafish alarm substances observing bottom-dwelling  
237 (Lima-Maximino et al., 2020; Quadros et al., 2016; Speedie and Gerlai, 2008) and a series of  
238 four small experiments on the effects of CAS on behavior during exposure  
239 (<https://github.com/lanec-unifesspa/5-HT-CAS/tree/master/data/behavioral/metanalysis>),  
240 following the RePAIR approach (Bonapersona et al., 2019). Sample sizes, means, and standard  
241 deviations for the primary endpoint “Time on bottom” were used to produce a prior distribution  
242 on the RePAIR script (<https://utrecht-university.shinyapps.io/repair/>). Final parameters of the  
243 distribution were  $\mu = 197.149$ ,  $\sigma^2 = 6100.609$ , and weighted  $N = 120.10$ . The parameters of this  
244 distribution were then used to calculate sample size, based on an effect size of  $d = 0.5$   
245 (equivalent to that used to calculate sample sizes in Lima-Maximino et al., 2020) and *a priori*  
246 power of 0.8, with one-tailed tests with error probability  $\alpha = 0.05$ . With these parameters, the  
247 final number of animals was 10 animals in the control group and 21 in each experimental group,  
248 reaching a prospective power of 92.34%.

249

### 250 2.3.3. Alarm substance extraction

251 A group of zebrafish was used as donor animals for the extraction of the conspecific  
252 alarm substance (CAS). CAS extraction procedure was performed on each animal individually  
253 as described by do Carmo Silva et al. (2018b). First, the donor animal was cold anesthetized  
254 and transferred to a Petri dish, where the excess water from its body was removed with a paper  
255 towel. Then the animal was decapitated with a surgical scalpel and the excess blood from the  
256 sectioned region was removed with a swab. Subsequently, the animal's bodies were transferred

257 to another Petri dish where 15 superficial cuts were made in the epidermis of animals (medial-  
258 ventral region) and 10 ml of distilled water were added to wash the cuts. After washing, the  
259 animal's bodies were removed from the Petri dish, and with the aid of a Pasteur pipette, the fish  
260 scales and other impurities were removed from the solution that was stored in a conical tube  
261 and preserved on ice. The same extraction procedure was performed for all donated animals.  
262

### 263 2.3.4. Observation apparatuses

264 To assess the effects of drugs on the alarm reaction, animals were transferred to a 12  
265 cm x 12 cm x 14 cm glass tank, filled with 1.5 L tank water, and allowed to swim freely for a 3  
266 min acclimation period. After this period, 7 mL CAS was added to the tank, from above, and  
267 filming started. The video camera (Sony® DCR-DVD610) was positioned in the front of the tank,  
268 therefore allowing observation and tracking of vertical distribution. Animals were allowed to  
269 freely explore this tank for 6 min before being transferred to a “washout” tank, which contained  
270 500 mL tank water. Animals were kept in this tank for 1 min, removing any residues of CAS  
271 before transference to the second apparatus. This second apparatus was a 25 cm x 24 cm x 20  
272 cm glass tank, filled with 5 L tank water; animals were allowed free exploration of this tank for 6  
273 min, during which behavior was filmed from the front of the tank. Tanks for both stages were  
274 differently shaped to increase the novelty of the second environment, a variable that is important  
275 to induce an anxiety-like “diving” response in animals not exposed to CAS (Bencan et al., 2009).  
276

## 277 2.4. Experiment 2: Effects of MK-212 on acute restraint stress- 278 elicited behavior

### 279 2.4.1. Experimental design

280 In this experiment, we focus on assessing the effects of activation of 5-HT<sub>2C</sub> receptors on  
281 anxiogenic-like effects of acute restraint stress (ARS). In order to do this, we evaluate the  
282 behavior of the animals in the novel tank test after being subjected to a 90-min session of  
283 restraint stress (Figure 1B). After drug (MK-212) or vehicle (Cortland's salt solution) injection  
284 and anesthesia, each animal was transferred individually to a 2 mL microtube (Eppendorf®)  
285 and placed on a plastic microtube rack inside an aquarium with continuous oxygen supply. The  
286 microtubes had small holes at both ends to allow free circulation of water inside the tube and to  
287 prevent fish from moving around, according to the protocol of Piato et al. (2011). A control group  
288 was maintained in a similar tank, but without restraint stress. Animals remained in these  
289 conditions for 90 min., sufficient to induce changes in telencephalon neurochemistry (Assad et  
290 al., 2020) and marked anxiety-like behavior (Assad et al., 2020; Ghisleni et al., 2012; Piato et  
291 al., 2011). After stress, the animals were transferred to the apparatus of the novel tank test, a  
292 transparent glass aquarium filled with 5 L of mineral water where the animal can freely explore  
293 the space for a period 6 minutes during which their behavior was recorded, following the  
294 protocol described in Lima-Maximino et al., (2020). All stages of the experiment were performed  
295 under constant white Gaussian noise, producing an average of 58 dB above the tank. Light  
296 levels above the tanks were measured using a handheld light meter, and ranged from 254 to  
297 276 lumens (coefficient of variation = 3.401% between subjects). Random allocation was made  
298 as described above. In all experiments, experimenters and data analysts were blinded to drugs  
299 by using coded vials (with the same code used for randomization); blinding was removed only

300 after data analysis. Experimenters were not blinded to treatment, but data analysts were blinded  
301 to both treatment and drug. Experiments were always run between 08:00AM and 02:00 PM.  
302 After experiments, animals were sacrificed by prolonged bath in ice-cold water (< 12 °C),  
303 followed by spinal transection (Matthews and Varga, 2012).

304

## 305 2.4.2. Sample size determination

306 Sample sizes were based on previous experiments with the behavioral effects of ARS  
307 (Assad et al., 2020).

308

## 309 2.4.3. Observation apparatus

310 To analyze the behavioral effects of treatment (ARS exposure) and drug, the same  
311 apparatus used in the second stage of the previous experiment (5-L transparent glass tank) was  
312 used.

313

## 314 2.5. Behavioral endpoints

315 Video files for each experiment were stored and later analyzed using automated video  
316 tracking (TheRealFishTracker; <http://www.dgp.toronto.edu/~mccrae/projects/FishTracker/>). The  
317 following variables were extracted:

- 318 ● Time spent on bottom third of the tank (s)[Primary outcome]
- 319 ● Time spent on top third of the tank (s)[Secondary outcome]
- 320 ● Erratic swimming, measured as absolute turn angle [Secondary outcome]

321 ● Freezing (s), measured as time spent in a speed lower than 0.5 cm/s [Secondary  
322 outcome]

323 ● Swimming speed (cm/s) [Secondary outcome]

324

## 325 2.6. Quality control

326 **Exclusion criteria:** With the exception of outlier exclusion (see 2.7, “Statistical analysis”,  
327 below), no exclusion criteria were predetermined.

328 **Behavioral data:** Quality control of samples was maintained by periodic assessment of water  
329 quality and health parameters. All experimenters were trained in the behavioral methods before  
330 experiments; training included observation of all experiments by a PI (CM or MGL) on at least  
331 two occasions. After these observations, each trainee performed two mock experiments, on a  
332 single subject each, while being observed by the PI. All protocols were reviewed by all PIs, and  
333 are publicly available. Behavioral records were reviewed by at least one PI for  
334 administration/scoring accuracy, in order to ensure adherence to protocols and consistency  
335 across tests.

336

## 337 2.7. Statistical analysis

338 Data were analyzed using two-way analysis of variance (drug x exposure to stressor)  
339 with sequential sum of squares (type I), followed by Tukey's post-tests when  $p < 0.05$ . Data  
340 analysis, table organization, and result graphs were performed using R version 3.6.3 (2020-02-  
341 29). Effect sizes for ANOVA effects are shown as  $\omega^2$ ; effect sizes for post-hoc tests were shown  
342 as Cohen's d. Outliers were removed based on median absolute differences (MADs), using time

343 on bottom as the main endpoint; values were removed when they were higher or lower than 3  
344 MADs around the median (Leys et al., 2013), and the number of outliers was reported in the  
345 results.

346

## 347 3. Results

### 348 3.1. Effects of MK-212 on alarm reaction and post-exposure

#### 349 behavior

##### 350 3.1.1. During exposure

351 One animal from the control + 0 mg/kg group was detected as outlier and removed.  
352 Small-to-medium-sized main effects of treatment ( $F_{[1, 114]} = 6.337$ ,  $p = 0.0132$ ;  $\omega^2 = 0.039$ ) and  
353 dose ( $F_{[2, 114]} = 3.665$ ,  $p = 0.0287$ ;  $\omega^2 = 0.039$ ) were found for time on top. A small-to-medium  
354 interaction effect was also found ( $F_{[2, 114]} = 4.602$ ,  $p = 0.012$ ;  $\omega^2 = 0.052$ ). Post-hoc tests found  
355 that CAS did not alter time on top ( $p = 0.94$ ,  $d = 0.3$ , non-treated controls vs. non-treated CAS),  
356 but MK-212 (1 mg/kg) increased it in non-exposed animals (1 mg/kg:  $p = 0.024$ ,  $d = -1.05$ , non-  
357 treated controls vs. 1 mg/kg controls; 2 mg/kg:  $p = 0.994$ ,  $d = -0.18$ , non-treated controls vs. 2  
358 mg/kg controls; Figure 2A).

359 Medium-to-large-sized main effects of treatment ( $F_{[1, 114]} = 20.995$ ,  $p = 1.18 \times 10^{-5}$ ;  $\omega^2 =$   
360  $0.12$ ) and dose ( $F_{[2, 114]} = 11.455$ ,  $p = 2.93 \times 10^{-5}$ ;  $\omega^2 = 0.125$ ) were found for time on bottom. A  
361 small-to-medium interaction effect was also found ( $F_{[2, 114]} = 4.085$ ,  $p = 0.0194$ ;  $\omega^2 = 0.037$ ).  
362 Post-hoc tests revealed that CAS increased time on bottom ( $p < 0.001$ ,  $d = -0.77$  for the main



363 effect), and the highest MK-212 dose blocked this effect (*1 mg/kg*:  $p = 0.39$ ,  $d = -0.64$ , non-  
364 treated controls vs. treated CAS;  $p = 0.38$ ,  $d = 0.6$ , non-treated CAS vs. treated CAS; *2 mg/kg*:  $p$   
365  $= 0.828$ ,  $d = 0.4$ , non-treated controls vs. treated CAS;  $p < 0.001$ ,  $d = 1.64$ , non-treated CAS vs.  
366 treated CAS; Figure 2B).

367 A small-to-medium-sized main effect of treatment ( $F_{[1, 114]} = 5.137$ ,  $p = 0.0253$ ;  $\omega^2 =$   
368  $0.017$ ), but not dose ( $F_{[2, 114]} = 2.948$ ,  $p = 0.0565$ ;  $\omega^2 = 0.016$ ), was found for erratic swimming. A  
369 very large interaction effect was also found for this variable ( $F_{[2, 114]} = 57.101$ ,  $p < 2 \times 10^{-16}$ ;  $\omega^2 =$   
370  $0.467$ ). Post-hoc tests showed that CAS greatly increased absolute turn angle in non-treated  
371 animals ( $p < 0.001$ ,  $d = -2.58$ , non-treated controls vs. non-treated CAS), an effect that was  
372 blocked by both MK-212 doses (*1 mg/kg*:  $p = 1$ ,  $d = -0.04$ , non-treated controls vs. treated CAS;  
373  $p < 0.001$ ,  $d = 2.53$ , non-treated CAS vs. treated CAS; *2 mg/kg*:  $p = 0.81$ ,  $d = -0.42$ , non-treated  
374 controls vs. treated CAS;  $p < 0.001$ ,  $d = 2.16$ , non-treated CAS vs. treated CAS; Figure 2C);  
375 however, MK-212 also increased absolute turn angle in animals which were not exposed to  
376 CAS (*1 mg/kg*:  $p < 0.001$ ,  $d = -1.95$ , non-treated controls vs. treated controls; *2 mg/kg*:  $p <$   
377  $0.001$ ,  $d = -1.91$ , non-treated controls vs. treated controls).

378 A large-sized main effect of treatment ( $F_{[1, 114]} = 15.219$ ,  $p = 0.000162$ ;  $\omega^2 = 0.105$ ), but  
379 no effect of MK-212 dose ( $F_{[2, 114]} = 1.037$ ,  $p = 0.358$ ;  $\omega^2 = 0.001$ ). No interaction effects were  
380 found ( $F_{[2, 114]} = 1.662$ ,  $p = 0.194$ ;  $\omega^2 = 0.01$ ). Post-hoc tests suggested that CAS increased  
381 freezing at all MK-212 doses and controls ( $p < 0.001$ ,  $d = -0.72$  for the main effect of CAS;  
382 Figure 2D).

383 No main effects of treatment ( $F_{[1, 114]} = 0.005$ ,  $p = 0.9459$ ;  $\omega^2 = -0.008$ ) nor MK-212 dose  
384 ( $F_{[2, 114]} = 0.211$ ,  $p = 0.8105$ ;  $\omega^2 = -0.013$ ) were found for swimming speed. While a small-to-  
385 medium-sized interaction effect was found ( $F_{[2, 114]} = 4.652$ ,  $p = 0.0114$ ;  $\omega^2 = 0.059$ ;  $f^2 = 0.29$ ),  
386 post-hoc tests found no differences across groups (Figure 2E).

387

### 388 3.1.2. After exposure

389 In the novel tank test after CAS exposure and washout, no main effects of treatment ( $F_{[1, 114]} = 0.945$ ,  $p = 0.333$ ;  $\omega^2 = 0$ ) were found for time on top. However, a medium-sized main  
390 effect of MK-212 dose was found ( $F_{[2, 114]} = 4.892$ ,  $p = 0.009$ ;  $\omega^2 = 0.06$ ). Interaction effects were  
391 also absent ( $F_{[2, 114]} = 2.393$ ,  $p = 0.0959$ ;  $\omega^2 = 0.021$ ). Post-hoc tests revealed that MK-212 (1  
392 mg/kg) increased time on top in both controls and CAS-exposed animals (1 mg/kg:  $p = 0.019$ ,  $d$   
393 = -0.63 vs. non-treated animals;  $p = 0.038$ ,  $d = 0.54$  vs. 2 mg/kg; 2 mg/kg:  $p = 0.92$ ,  $d = -0.09$   
394 vs. non-treated animals; Figure 3A).

395  
396 Medium-to-large-sized main effects of treatment ( $F_{[1, 114]} = 7.751$ ,  $p = 0.0063$ ;  $\omega^2 = 0.048$ )  
397 and MK-212 dose ( $F_{[2, 114]} = 5.385$ ,  $p = 0.0058$ ) were found for time on bottom. A medium-to-  
398 large-sized interaction effect was also found ( $F_{[2, 114]} = 4.203$ ,  $p = 0.0173$ ;  $\omega^2 = 0.045$ ). Post-hoc  
399 tests suggested that MK-212 (1 mg/kg) decreased time on bottom in control animals (Figure  
400 3B), but not in CAS-exposed animals (1 mg/kg:  $p = 0.002$ ,  $d = 1.31$ , non-treated controls vs. 1  
401 mg/kg controls;  $p = 1.0$ ,  $d = 0.1$ , non-treated CAS vs. 1 mg/kg CAS; 2 mg/kg:  $p = 0.99$ ,  $d = 0.21$ ,  
402 non-treated controls vs. 2 mg/kg controls;  $p = 1$ ,  $d = 0.01$ , non-treated CAS vs. 2 mg/kg CAS).

403 No effect of treatment was found for erratic swimming ( $F_{[1, 114]} = 3.641$ ,  $p = 0.0589$ ;  $\omega^2 =$   
404 0.018). A large-sized main effect of drug was found ( $F_{[2, 114]} = 9.244$ ,  $p = 0.00019$ ;  $\omega^2 = 0.112$ ),  
405 as well as medium-to-large-sized interaction effect ( $F_{[2, 114]} = 4.951$ ,  $p = 0.00867$ ;  $\omega^2 = 0.054$ ).  
406 Post-hoc tests suggested a synergistic effect between CAS and MK-212 at 2 mg/kg, which  
407 potentiated CAS-elicited increases in erratic swimming (Figure 3C); moreover, 1 mg/kg MK-212  
408 increased erratic swimming in control animals (1 mg/kg:  $p = 0.026$ ,  $d = -1.05$ , non-treated  
409 controls vs. 1 mg/kg controls;  $p = 1.0$ ,  $d = -0.16$ , non-treated CAS vs. 1 mg/kg CAS; 2 mg/kg:  $p$   
410 = 0.22,  $d = -0.76$ , non-treated controls vs. 2 mg/kg controls;  $p = 0.002$ ,  $d = -1.21$ , non-treated  
411 CAS vs. 2 mg/kg CAS).

412 A small-to-medium main effect of treatment ( $F_{[1, 114]} = 4.658$ ,  $p = 0.033$ ;  $\omega^2 = 0.025$ ) and  
413 a large main effect of MK-212 dose were found for freezing ( $F_{[2, 114]} = 11.617$ ,  $p = 2.56 \times 10^{-5}$ ;  $\omega^2$   
414  $= 0.143$ ). No interaction effects were found ( $F_{[2, 114]} = 2.777$ ,  $p = 0.0664$ ;  $\omega^2 = 0.024$ ). Post-hoc  
415 tests revealed that CAS increased freezing ( $p = 0.05$ ,  $d = -0.364$  for the main effect), an effect  
416 that was blocked by all MK-212 doses ( $1 \text{ mg/kg}$ :  $p = 0.74$ ,  $d = 0.47$ , non-treated controls vs.  $1$   
417  $\text{mg/kg}$  controls;  $p < 0.001$ ,  $d = 1.5$ , non-treated CAS vs.  $1 \text{ mg/kg}$  CAS;  $2 \text{ mg/kg}$ :  $p = 0.85$ ,  $d =$   
418  $0.4$ , non-treated controls vs.  $2 \text{ mg/kg}$  controls;  $p = 0.002$ ,  $d = 1.22$ , non-treated CAS vs.  $2 \text{ mg/kg}$   
419 CAS; Figure 3D).

420 No main effects of treatment ( $F_{[1, 114]} = 0.111$ ,  $p = 0.74$ ;  $\omega^2 = -0.007$ ) or dose ( $F_{[2, 114]} =$   
421  $1.339$ ,  $p = 0.266$ ;  $\omega^2 = 0.006$ ), nor an interaction effect ( $F_{[2, 114]} = 0.981$ ,  $p = 0.378$ ;  $\omega^2 = 0.0$ ),  
422 were found for swimming speed (Figure 3E).

423

## 424 3.2. Effects of WAY-161503 on alarm reaction and post-exposure 425 behavior

### 426 3.2.1. During exposure

427 No outliers were detected from any group in this experiment. A small-to-medium-sized  
428 main effect of treatment ( $F_{[1, 69]} = 7.404$ ,  $p = 0.00823$ ,  $\omega^2 = 0.08$ ), but not drug ( $F_{[1, 69]} = 1.751$ ,  $p =$   
429  $0.19011$ ,  $\omega^2 = 0.009$ ), was found for time on top. No interaction effect was found ( $F_{[1, 69]} = 1.001$ ,  
430  $p = 0.32067$ ,  $\omega^2 = 0.0$ ). Post-hoc tests showed that while CAS did not alter time on top ( $p =$   
431  $0.054$ ,  $d = 1.0$ , non-treated controls vs. non-treated CAS), a synergistic effect was apparent,  
432 with WAY-161503-treated animals showing less time on top than controls ( $p = 0.381$ ,  $d = 0.618$ ,  
433 non-treated controls vs. WAY-161503 controls;  $p = 0.977$ ,  $d = 0.125$ , non-treated CAS vs. WAY-

434 161503 CAS;  $p = 0.023$ ,  $d = 1.125$ , non-treated controls vs. WAY 161-503 CAS; Figure 4A).

435 Large main effects of treatment ( $F_{[1, 69]} = 10.842$ ,  $p = 0.00157$ ,  $\omega^2 = 0.103$ ) and drug ( $F_{[1,$   
436  $69]} = 10.138$ ,  $p = 0.00218$ ,  $\omega^2 = 0.096$ ) were found for time on bottom. A medium-to-large-sized  
437 interaction effect was found ( $F_{[1, 69]} = 4.614$ ,  $p = 0.03523$ ,  $\omega^2 = 0.038$ ). Post-hoc tests revealed  
438 that CAS increased time on bottom ( $p = 0.007$ ,  $d = -1.287$ , non-treated controls vs. non-treated  
439 CAS), and WAY-161503 blocked this effect ( $p = 0.989$ ,  $d = 0.123$ , non-treated controls vs.  
440 WAY-161503 controls;  $p = 0.002$ ,  $d = 1.181$ , non-treated CAS vs. WAY-161503 CAS; Figure  
441 4B).

442 Very large main effects of treatment ( $F_{[1, 69]} = 108.37$ ,  $p = 8.66 \times 10^{-16}$ ,  $\omega^2 = 0.311$ ) and  
443 drug ( $F_{[1, 69]} = 122.99$ ,  $p = 2 \times 10^{-16}$ ,  $\omega^2 = 0.353$ ) were found for erratic swimming. A very large  
444 interaction effect was also found ( $F_{[1, 69]} = 44.24$ ,  $p = 5.67 \times 10^{-9}$ ,  $\omega^2 = 0.125$ ). Again, post-hoc  
445 tests suggested that CAS increased erratic swimming ( $p < 0.001$ ,  $d = -3.984$ , non-treated  
446 controls vs. non-treated CAS), while WAY-161503 blocked this effect ( $p = 0.302$ ,  $d = 0.6759$ ,  
447 non-treated controls vs. WAY-161503 controls;  $p < 0.001$ ,  $d = 3.9537$ , non-treated CAS vs.  
448 WAY-161503 CAS; Figure 4C).

449 A large main effect of treatment ( $F_{[1, 69]} = 8.582$ ,  $p = 0.0046$ ,  $\omega^2 = 0.094$ ), but not of drug  
450 ( $F_{[1, 69]} = 0.564$ ,  $p = 0.4552$ ,  $\omega^2 = -0.005$ ), was found for freezing duration; no interaction effect  
451 was found ( $F_{[1, 69]} = 1.434$ ,  $p = 0.2352$ ,  $\omega^2 = 0.005$ ). Post-hoc tests revealed that CAS increased  
452 freezing ( $p = 0.047$ ,  $d = -1.02$ , non-treated controls vs. non-treated CAS), but this effect was not  
453 blocked by WAY-161503 ( $p = 0.967$ ,  $d = -0.178$ , non-treated controls vs. WAY-161503 controls;  
454  $p = 0.544$ ,  $d = 0.412$ , non-treated CAS vs. WAY-161503 CAS; Figure 4D).

455 Finally, no effects of treatment ( $F_{[1, 69]} = 2.303$ ,  $p = 0.134$ ,  $\omega^2 = 0.018$ ), drug ( $F_{[1, 69]} =$   
456  $0.103$ ,  $p = 0.749$ ,  $\omega^2 = -0.012$ ), or treatment:drug interaction ( $F_{[1, 69]} = 0.527$ ,  $p = 0.471$ ,  $\omega^2 = -$   
457  $0.006$ ) were found for swimming speed (Figure 4E).

458

### 459 3.2.2. After exposure

460 No main effects of treatment ( $F_{[1, 69]} = 3.221$ ,  $p = 0.0771$ ,  $\omega^2 = 0.026$ ) were found for time  
461 on top, but a small-to-medium effect of drug was found ( $F_{[1, 69]} = 4.254$ ,  $p = 0.0429$ ,  $\omega^2 = 0.039$ ).  
462 A medium-sized interaction was also found ( $F_{[1, 69]} = 6.352$ ,  $p = 0.014$ ,  $\omega^2 = 0.064$ ). Post-hoc  
463 effects revealed a synergistic effect, with WAY-161503 increasing time on top in animals  
464 exposed to CAS ( $p = 0.922$ ,  $d = 0.242$ , non-treated controls vs. non-treated CAS;  $p = 0.907$ ,  
465  $0.259$ , non-treated controls vs. WAY-161503 controls;  $p = 0.011$ ,  $d = 0.9833$ , non-treated CAS  
466 vs. WAY-161503 CAS; Figure 5A).

467 No main effects of treatment ( $F_{[1, 69]} = 1.95$ ,  $p = 0.1671$ ,  $\omega^2 = 0.012$ ) were found for time  
468 on bottom, but a small-to-medium effect of drug was found ( $F_{[1, 69]} = 4.107$ ,  $p = 0.0466$ ,  $\omega^2 =$   
469  $0.039$ ). No significant interaction was observed ( $F_{[1, 69]} = 3.267$ ,  $p = 0.0751$ ,  $\omega^2 = 0.029$ ). Post-  
470 hoc tests suggested a synergistic effect, with WAY-161503 decreasing time on bottom in  
471 animals exposed to CAS ( $p = 0.988$ ,  $d = -0.1243$ , non-treated controls vs. non-treated CAS;  $p =$   
472  $0.999$ ,  $d = -0.0538$ , non-treated controls vs. WAY-161503 controls;  $p = 0.041$ ,  $d = 0.8369$ , non-  
473 treated CAS vs. WAY-161503 CAS; Figure 5B).

474 A large-sized main effect of treatment ( $F_{[1, 69]} = 16.119$ ,  $p = 0.000149$ ,  $\omega^2 = 0.174$ ) was  
475 found for erratic swimming, but no main effect of drug ( $F_{[1, 69]} = 0.568$ ,  $p = 0.454$ ,  $\omega^2 = -0.005$ )  
476 nor an interaction effect ( $F_{[1, 69]} = 0.042$ ,  $p = 0.838$ ,  $\omega^2 = -0.011$ ) were found. However, post-  
477 hoc tests did not find an increase in erratic swimming with CAS ( $p = 0.125$ ,  $d = -0.857$ ), nor a  
478 synergistic effect of WAY-161503 ( $p = 0.922$ ,  $d = 0.243$ , non-treated controls vs. WAY-161503  
479 controls;  $p = 0.968$ ,  $d = 0.142$ , non-treated CAS vs. WAY-161503 CAS; Figure 5C).

480 A medium-sized main effect of treatment ( $F_{[1, 69]} = 4.726$ ,  $p = 0.0331$ ,  $\omega^2 = 0.43$ ) was  
481 found for freezing, and a medium-sized main effect of drug was also found ( $F_{[1, 69]} = 4.17$ ,  $p =$   
482  $0.04497$ ,  $\omega^2 = 0.037$ ). A medium-to-large interaction effect was observed for freezing as well

483 ( $F_{[1, 69]} = 7.663$ ,  $p = 0.00723$ ,  $\omega^2 = 0.077$ ). Post-hoc tests revealed that CAS increased freezing  
484 ( $p = 0.009$ ,  $d = -1.257$ , non-treated controls vs. non-treated CAS), while WAY-161503 blocked  
485 this effect ( $p = 0.816$ ,  $d = -0.338$ , non-treated controls vs. WAY-161503 controls;  $p = 0.008$ ,  $d =$   
486  $1.026$ , non-treated CAS vs. WAY-161-503 CAS; Figure 5D).

487 Finally, no main effects of treatment ( $F_{[1, 69]} = 3.85$ ,  $p = 0.0538$ ,  $\omega^2 = 0.038$ ) or drug ( $F_{[1, 69]}$   
488  $= 0.416$ ,  $p = 0.5212$ ,  $\omega^2 = -0.008$ ) were found for swimming speed, and an interaction effect was  
489 also absent ( $F_{[1, 69]} = 0.062$ ,  $p = 0.8037$ ,  $\omega^2 = -0.013$ )(Figure 5E).

490

### 491 3.3. Effects of RS-102221 on alarm reaction and post-exposure 492 behavior

#### 493 3.3.1. During exposure

494 One outlier was detected in the group exposed to CAS and injected with vehicle. A large  
495 effect of treatment ( $F_{[1, 68]} = 8.89$ ,  $p = 0.004$ ,  $\omega^2 = 0.101$ ) was found for time on top, but no main  
496 effect of drug ( $F_{[1, 68]} = 0.166$ ,  $p = 0.685$ ,  $\omega^2 = -0.011$ ) nor an interaction effect ( $F_{[1, 68]} = 0.096$ ,  $p =$   
497  $0.757$ ,  $\omega^2 = -0.012$ ) were found for this variable. Post-hoc tests suggested that CAS decreased  
498 time on top ( $p = 0.004$ ,  $d = 0.74$  for the main effect); RS-10221 was not able to change this  
499 effect ( $p = 0.353$ ,  $d = 0.64$ , non-treated controls vs. treated CAS;  $p = 0.941$ ,  $d = -0.18$ , non-  
500 treated CAS vs. treated CAS; Figure 6A).

501 A very large main effect of treatment ( $F_{[1, 68]} = 80.6$ ,  $p = 1.09 \times 10^{-13}$ ,  $\omega^2 = 0.53$ ), but not  
502 dose ( $F_{[1, 68]} = 0.189$ ,  $p = 0.665$ ,  $\omega^2 = -0.005$ ), nor an interaction effect ( $F_{[1, 68]} = 0.517$ ,  $p = 0.474$ ,  
503  $\omega^2 = -0.003$ ), were found for time on bottom (Figure 6B). Post-hoc tests suggested that CAS  
504 increased time on bottom ( $p < 0.001$ ,  $d = -2.22$  for the main effect), and RS-10221 was not able

505 to change this effect ( $p < 0.001$ ,  $d = -2.12$ , non-treated controls vs. treated CAS;  $p = 0.8$ ,  $d =$   
506  $0.29$ , non-treated CAS vs. treated CAS).

507 A large main effect of treatment ( $F_{[1, 68]} = 36.85$ ,  $p = 7.98 \times 10^{-8}$ ,  $\omega^2 = 0.33$ ) was found for  
508 erratic swimming, but no main effect of drug was found ( $F_{[1, 68]} = 2.86$ ,  $p = 0.095$ ,  $\omega^2 = 0.017$ ),  
509 nor was an interaction effect found ( $F_{[1, 68]} = 0.002$ ,  $p = 0.965$ ,  $\omega^2 = -0.009$ ). Post-hoc tests  
510 suggested that CAS increased erratic swimming ( $p < 0.01$ ,  $d = -1.5$  for the main effect), an effect  
511 that was not blocked or increased by RS-10221 ( $p < 0.001$ ,  $d = -1.92$ , non-treated controls vs.  
512 treated CAS;  $p = 0.56$ ,  $d = -0.41$ , non-treated CAS vs. treated CAS; Figure 6C).

513 A large main effect of treatment ( $F_{[1, 68]} = 37.61$ ,  $p = 2.46 \times 10^{-8}$ ,  $\omega^2 = 0.325$ ), but not drug  
514 ( $F_{[1, 68]} = 2.65$ ,  $p = 0.108$ ,  $\omega^2 = 0.015$ ), was found for freezing; no interaction effects were found  
515 ( $F_{[1, 68]} = 3.23$ ,  $p = 0.077$ ,  $\omega^2 = 0.020$ ). Post-hoc tests revealed that CAS increased freezing ( $p <$   
516  $0.001$ ,  $d = -1.52$  for the main effect), and RS-10221 partially blocked this effect ( $p = 0.025$ ,  $d = -$   
517  $1.12$ , non-treated controls vs. treated CAS;  $p = 0.041$ ,  $d = 0.85$ , non-treated CAS vs. treated  
518 CAS; Figure 6D).

519 Finally, no main effects of treatment ( $F_{[1, 68]} = 1.80$ ,  $p = 0.184$ ,  $\omega^2 = 0.011$ ) nor drug ( $F_{[1, 68]}$   
520  $= 2.146$ ,  $p = 0.148$ ,  $\omega^2 = 0.016$ ) were found for swimming speed (Figure 6E). Interaction effects  
521 were also absent ( $F_{[1, 68]} = 0.475$ ,  $p = 0.493$ ,  $\omega^2 = -0.007$ ).

522

### 523 3.3.2. After exposure

524 No main effects of treatment ( $F_{[1, 68]} = 1.615$ ,  $p = 0.21$ ,  $\omega^2 = 0.009$ ) or drug ( $F_{[1, 68]} =$   
525  $0.032$ ,  $p = 0.858$ ,  $\omega^2 = -0.013$ ), were found for time on top (Figure 7A); an interaction effect was  
526 also absent ( $F_{[1, 68]} = 1.152$ ,  $p = 0.287$ ,  $\omega^2 = 0.002$ ).

527 A medium-sized main effect of treatment ( $F_{[1, 68]} = 4.39$ ,  $p = 0.04$ ,  $\omega^2 = 0.035$ ), as well as  
528 a large effect of drug ( $F_{[1, 68]} = 22.7964$ ,  $p = 9.96 \times 10^{-6}$ ,  $\omega^2 = 0.18$ ), were found for time on  
529 bottom (Figure 7B). A medium-sized interaction effect was also found ( $F_{[1, 68]} = 4.08$ ,  $p = 0.047$ ,



530  $\omega^2 = 0.032$ ). Post-hoc tests suggested that CAS increased time on bottom after exposure ( $p =$   
531  $0.05$ ,  $d = 1.02$ , non-treated controls vs. non-treated CAS), an effect that was blocked by RS-  
532 10221 ( $p = 0.506$ ,  $d = 0.54$ , non-treated controls vs. treated CAS;  $p < 0.001$ ,  $d = 1.55$ , non-  
533 treated CAS vs. treated CAS).

534 A large main effect of treatment ( $F_{[1, 68]} = 36.1896$ ,  $p = 7.98 \times 10^{-8}$ ,  $\omega^2 = 0.325$ ), but not  
535 drug ( $F_{[1, 68]} = 2.9573$ ,  $p = 0.09$ ,  $\omega^2 = 0.018$ ), were found for erratic swimming (Figure 7C). No  
536 interaction effect was found ( $F_{[1, 68]} = 0.0019$ ,  $p = 0.965$ ,  $\omega^2 = -0.009$ ). Post-hoc tests suggested  
537 that CAS increased erratic swimming after exposure ( $p = 0.001$ ,  $d = 1.514$ , non-treated controls  
538 vs. non-treated CAS), an effect that was not altered by RS-10221 ( $p < 0.001$ ,  $d = -1.92$ , non-  
539 treated controls vs. treated CAS;  $p = 0.56$ ,  $d = -0.41$ , non-treated CAS vs. treated CAS).

540 A large main effect of treatment ( $F_{[1, 68]} = 39.7692$ ,  $p = 2.46 \times 10^{-8}$ ,  $\omega^2 = 0.334$ ) and a  
541 small main effect of drug ( $F_{[1, 68]} = 4.16$ ,  $p = 0.045$ ,  $\omega^2 = 0.027$ ), were found for freezing; no  
542 interaction effects were found ( $F_{[1, 68]} = 3.23$ ,  $p = 0.077$ ,  $\omega^2 = 0.019$ ). Post-hoc tests suggested  
543 that CAS increased freezing after exposure ( $p < 0.001$ ,  $d = 1.96$ , non-treated controls vs. non-  
544 treated CAS), an effect that was partially blocked by RS-10221 ( $p = 0.025$ ,  $d = -1.12$ , non-  
545 treated controls vs. treated CAS;  $p = 0.041$ ,  $d = 0.85$ ; Figure 7D).

546 Finally, no main effects of treatment ( $F_{[1, 68]} = 1.014$ ,  $p = 0.317$ ,  $\omega^2 = 0.0$ ) or drug ( $F_{[1, 68]} =$   
547  $1.83$ ,  $p = 0.181$ ,  $\omega^2 = 0.011$ ) were found for swimming speed, nor was there an interaction effect  
548 for this variable ( $F_{[1, 68]} = 0.475$ ,  $p = 0.493$ ,  $\omega^2 = -0.007$ . Figure 7E).

549

550



### 551 3.4. Effects of MK-212 on restraint stress-elicited behavioral 552 changes

553 No main effects of treatment ( $F_{[1, 23]} = 0.167$ ,  $p = 0.687$ ,  $\omega^2 = -0.026$ ) nor drug ( $F_{[1, 23]} =$   
554  $3.884$ ,  $p = 0.061$ ,  $\omega^2 = 0.089$ ), were found for time on top (Figure 8A). No interaction effects  
555 were found as well ( $F_{[1, 23]} = 4.215$ ,  $p = 0.052$ ,  $\omega^2 = 0.1$ ).

556 A medium-sized main effect of treatment ( $F_{[1, 23]} = 6.3864$ ,  $p = 0.019$ ,  $\omega^2 = 0.099$ ), but  
557 not drug ( $F_{[1, 23]} = 0.0879$ ,  $p = 0.77$ ,  $\omega^2 = -0.017$ ), was found for time on bottom (Figure 8B). A  
558 large treatment:drug interaction effect was found ( $F_{[1, 23]} = 8.5023$ ,  $p = 0.008$ ,  $\omega^2 = 0.22$ ). Post-  
559 hoc tests showed that ASR increased time on bottom ( $p = 0.038$ ,  $d = -1.566$  vs. non-treated  
560 controls), and MK-212 (2 mg/kg) blocked this effect ( $p = 0.757$ ,  $d = -0.495$  non-treated controls  
561 vs. treated ASR).

562 A large main effect of treatment ( $F_{[1, 23]} = 17.9732$ ,  $p = 0.00031$ ,  $\omega^2 = 0.398$ ), but not drug  
563 ( $F_{[1, 23]} = 0.446$ ,  $p = 0.511$ ,  $\omega^2 = -0.013$ ), was found for erratic swimming (Figure 8C). No  
564 interaction effects were found ( $F_{[1, 23]} = 0.193$ ,  $p = 0.664$ ,  $\omega^2 = -0.019$ ). Post-hoc tests suggested  
565 that a ASR increased erratic swimming ( $p < 0.001$ ,  $d = -1.57$  for the main effect), an effect that  
566 was not blocked by MK-212 ( $p = 0.006$ ,  $d = -1.85$ , non-treated controls vs. treated ASR).

567 No main effects of treatment ( $F_{[1, 23]} = 0.384$ ,  $p = 0.541$ ,  $\omega^2 = -0.016$ ) nor drug ( $F_{[1, 23]} =$   
568  $0.618$ ,  $p = 0.44$ ,  $\omega^2 = -0.01$ ) were found for freezing (Figure 8D). A large interaction effect was  
569 found ( $F_{[1, 23]} = 12.339$ ,  $p = 0.002$ ,  $\omega^2 = 0.304$ ). Post-hoc tests suggested that animals injected  
570 with MK-212 and subjected to ASR showed decreased freezing in relation to other groups ( $p =$   
571  $0.033$ ,  $d = -1.6$ , non-treated controls vs. treated ASR;  $p = 0.031$ ,  $d = 1.6$ , non-treated ASR vs.  
572 treated ASR).

573 Finally, no main effects of treatment ( $F_{[1, 23]} = 1.0005$ ,  $p = 0.328$ ,  $\omega^2 = 0.0$ ) nor drug ( $F_{[1, 23]}$

574 = 0.0283,  $p = 0.868$ ,  $\omega^2 = -0.038$ ) were found for swimming speed (Figure 8E). No interaction  
575 effect was found for this variable ( $F_{[1, 23]} = 0.5437$ ,  $p = 0.468$ ,  $\omega^2 = -0.018$ ).

576

## 577 4. Discussion

578 The present work tested the hypothesis that phasic activation of the 5-HT<sub>2C</sub> receptor is  
579 involved in behavioral adjustments to distal, but not proximal, threat in zebrafish, and that these  
580 receptors exerts a tonic facilitation of defensive behavior to potential threat in zebrafish. We  
581 found that 5-HT<sub>2C</sub> agonists blocked CAS-elicited defensive behavior, but not post-exposure  
582 increases in defensive behavior, nor ARS-elicited anxiogenic-like effects. We also found that  
583 RS-10221, a 5-HT<sub>2C</sub> receptor antagonist, did not change behavior during exposure, but it  
584 produced a small effect on behavior after exposure to CAS.

585

### 586 4.1. Effects of stressors on zebrafish behavior

587 One of the aims of this paper was to confirm the behavioral effects of CAS during and  
588 after exposure (Lima-Maximino et al., 2020), given the considerable variation in the literature  
589 (Maximino et al., 2019), and to compare the effects after exposure with those of ARS -  
590 considering that, while both CAS and ARS are anxiogenic stressors, from an ecological point of  
591 view both should affect different behavioral endpoints.

592 In the present experiments, CAS consistently increased bottom-dwelling and erratic  
593 swimming during exposure, with a smaller component of freezing. After exposure, a strong  
594 component of freezing was present, while erratic swimming contributed less to the overall

595 behavioral pattern. These results are consistent with what was observed both with a washout  
596 period (Lima-Maximino et al., 2020), and in the absence of a washout, but with an extended  
597 observation interval (Mathuru et al., 2012; Nathan et al., 2015). These effects suggest that, as  
598 threat levels change from distal (i.e., CAS is present) to potential (i.e., CAS is no longer  
599 present), a “residual” effect emerges that is marked by different behavioral components. This is  
600 similar to what is observed with electrical stimulation of the PAG/GR in rats (Brandão et al.,  
601 2008). We have previously shown that serotonin differentially mediates these behaviors,  
602 phasically inhibiting responses during exposure and tonically facilitating responses after  
603 exposure (Lima-Maximino et al., 2020).

604         ARS-elicited behavioral effects have been explored in the literature with mixed results.  
605 While Ghisleni et al. (2012) found that a 90-min restraint protocol did not change bottom-  
606 dwelling after stress when animals were tested individually, a similar protocol showed marked  
607 increases in this variable (Assad et al., 2020) - albeit control animals in the latter experiment  
608 spent most of the session in the upper half of the tank instead of in the lower half. In the present  
609 experiments, ARS increased bottom-dwelling as well. Moreover, we observed a small  
610 component of erratic swimming, consistent with what is observed by Ghisleni et al. (2012).  
611 While increased bottom-dwelling was also observed as a pattern of post-exposure behavior  
612 after CAS in the present experiments and in Lima-Maximino et al. (2020), freezing was a major  
613 component of post-exposure behavior, suggesting that stressors do not produce similar  
614 behavioral effects.

615

## 616 4.2. Role of the 5-HT<sub>2C</sub> receptor in CAS-elicited behavioral 617 adjustments

618 Both 5-HT<sub>2C</sub> receptor agonists were able to block CAS-elicited behavioral adjustments  
619 *during* exposure, but the effects on behavior after exposure were less impressive, with agonists  
620 blocking the increased geotaxis. While RS-10221, a 5-HT<sub>2C</sub> receptor antagonist, did not change  
621 behavior during exposure, it blocked some of the effects on post-exposure behavior. These  
622 results suggest that the 5-HT<sub>2C</sub> receptor has opposite roles in both stages, phasically inhibiting  
623 defensive responses to proximal threat and tonically facilitating responses to potential threat.

624 We have previously found that serotonin participates in responses to CAS, acutely and  
625 phasically inhibiting responses to proximal threat but phasically facilitating responses to  
626 potential threat (Lima-Maximino et al., 2020; Maximino et al., 2014). We suggested that phasic  
627 and tonic serotonin encode an aversive expectation value, switching behavior toward cautious  
628 exploration/risk assessment/anxiety when the aversive stimulus is no longer present. In the  
629 experimental design that was used in this experiment, behavior during exposure represents  
630 proximal threat, as CAS acts as a partial predator stimulus that elicits behavior that decreases  
631 the possibility of a predator attack or detection by the predator (Smith, 1992). However, if CAS  
632 is no longer present (as in the post-exposure stage of our design), that would signal a decrease  
633 in threat levels to potential threat, a situation in which trying to flee or hide is non-adaptive, but  
634 resuming normal behavior is also non-adaptive - and therefore cautious, alert exploration is  
635 warranted (Maximino et al., 2019). Using Fanselow's taxonomy, the situation in which CAS is  
636 present is more akin to "fear", while the situation in which it is no longer present is more akin to  
637 "anxiety" (Perusini and Fanselow, 2015). The rodent literature suggests that 5-HT<sub>2</sub> receptors  
638 participate in fear and anxiety. Salchner and Singewald (2006) have shown that MK-212

639 potentiates escape responses to an airjet in rats, and the antagonist SB-242084 has been  
640 shown to produce anxiolytic-like effects in rats (Kennett et al., 1997; Martin et al., 2002). In the  
641 elevated T-maze, an apparatus which tests anxiety-like behavior (inhibitory avoidance) and fear-  
642 like behavior (one-way escape), 5-HT<sub>2C</sub> agonists facilitate, and antagonists impair, inhibitory  
643 avoidance, but only agonists facilitate one-way escape (Mora et al., 1997), suggesting tonic  
644 facilitation of responses to potential threat and phasic inhibition of responses to distal or  
645 proximal threat. Thus, a conserved role for this receptor appears to be related to phasic and  
646 tonic modulation of defensive responses.

647         A role for 5-HT<sub>2</sub> receptors has also been suggested by pharmacological experiments in  
648 fish as well. In Nile tilapia the 5-HT<sub>2A/2C</sub> and  $\alpha_2$ -adrenoceptor antagonist mianserin blocked  
649 active components of the alarm reaction (dashing, bristling of dorsal fin spines), but not freezing,  
650 during exposure (Barreto, 2012). In zebrafish, the 5-HT<sub>2A/2B/2C</sub> receptor antagonist/5-HT1A  
651 receptor agonist methysergide increased freezing and bottom-dwelling during and after  
652 exposure at a high dose (92.79 mg/kg), but not at lower doses (Nathan et al., 2015). Our results  
653 are consistent with a major component of 5-HT<sub>2C</sub> receptors in these responses, although we did  
654 not find an effect of the antagonist during exposure. Thus, our results point to a specific role of  
655 the 5-HT<sub>2C</sub> receptor in phasic (inhibitory) control of defensive responses to proximal threat and  
656 tonic (stimulatory) control of responses to potential threat.

657         We have previously shown that, after exposure, serotonin levels are increased in the  
658 extracellular fluid of the zebrafish brain (Maximino et al., 2014), an effect that was mediated by  
659 both serotonin transporters (Maximino et al., 2014) and monoamine oxidase activity (Maximino  
660 et al., 2019; Quadros et al., 2018). This increase in serotonergic activity could activate 5-HT<sub>2C</sub>  
661 and other serotonergic receptors to inhibit ongoing defensive responses to proximal threat and  
662 initiate programs of alertness and cautious exploration/risk assessment. This phasic signal  
663 represents prediction errors (Amo et al., 2014; Lima-Maximino et al., 2020), while the tonic

664 activity, which facilitates responses to potential threat, has been proposed to represent a  
665 negative expectation value (Amo et al., 2014; Lima-Maximino et al., 2020). However, at least for  
666 the case of the 5-HT<sub>2C</sub> receptor, the phasic signals do not appear to represent all aversive  
667 values, as no effect of MK-212 was found for ARS-elicited responses. Our results suggest that  
668 the 5-HT<sub>2C</sub> receptor is at least partially responsible for both effects, acting as a “switch” between  
669 the two behavioral modes.

670 In general, our results are the first to determine a specific role of 5-HT<sub>2C</sub> receptors in  
671 zebrafish behavior, and add to the small literature on the role of this receptor in mammals as  
672 well. Further work is needed to understand whether this receptor interacts with other serotonin  
673 receptors known to be involved in defensive behavior in this species (Herculano and Maximino,  
674 2014) and if the effects during exposure are related to changes in serotonin levels. Moreover,  
675 given the importance of these phenotypes to understanding fear and panic states (Silva et al.,  
676 2020), further work will clarify the usefulness of this pharmacological profile in modelling panic  
677 disorder and anxiety.

678

## 679 Acknowledgments

680 This work was supported by a Conselho Nacional de Desenvolvimento Científico e Tecnológico  
681 (CNPq) grant (#400726/2016-5). CM is the recipient of a CNPq productivity grant (PQ2,  
682 #302998/2019-5).

683

## 684 References

- 685 Alves, S.H., Pinheiro, G., Motta, V., Landeira-Fernandez, J., Cruz, A.P.M., 2004. Anxiogenic  
686 effects in the rat elevated plus-maze of 5-HT<sub>2C</sub> agonists into ventral but not dorsal  
687 hippocampus. *Behav. Pharmacol.* 15, 37–43.
- 688 Amo, R., Fredes, F., Kinoshita, M., Aoki, R., Aizawa, H., Agetsuma, M., Aoki, T., Shiraki, T.,  
689 Kakinuma, H., Matsuda, M., Yamazaki, M., Takahoko, M., Tsuboi, T., Higashijima, S.,  
690 Miyasaka, N., Koide, T., Yabuki, Y., Yoshihara, Y., Fukai, T., Okamoto, H., 2014. The  
691 Habenulo-Raphe Serotonergic Circuit Encodes an Aversive Expectation Value Essential  
692 for Adaptive Active Avoidance of Danger. *Neuron* 84, 1034–1048.  
693 <https://doi.org/10.1016/j.neuron.2014.10.035>
- 694 Assad, N., Luz, W.L., Santos-Silva, M., Carvalho, T., Moraes, S., Picanço-Diniz, D.L.W., Bahia,  
695 C.P., Oliveira Batista, E. de J., da Conceição Passos, A., Oliveira, K.R.H.M., Herculano,  
696 A.M., 2020. Acute Restraint Stress Evokes Anxiety-Like Behavior Mediated by  
697 Telencephalic Inactivation and GabAergic Dysfunction in Zebrafish Brains. *Sci. Rep.* 10,  
698 5551. <https://doi.org/10.1038/s41598-020-62077-w>
- 699 Barreto, R.E., 2012. Mianserin affects alarm reaction to conspecific chemical alarm cues in Nile  
700 tilapia. *Fish Physiol. Biochem.* 43, 193–201. <https://doi.org/10.1007/s10695-016-0279-2>
- 701 Bencan, Z., Sledge, D., Levin, E.D., 2009. Buspirone, chlordiazepoxide and diazepam effects in  
702 a zebrafish model of anxiety. *Pharmacol. Biochem. Behav.* 94, 75–80.  
703 <https://doi.org/10.1016/j.pbb.2009.07.009>
- 704 Bonapersona, V., Hoijtink, H., RELACS, Sarabdjitsingh, R.A., Joëls, M., 2019. RePAIR: a power  
705 solution to animal experimentation. *bioRxiv* 864652. <https://doi.org/10.1101/864652>
- 706 Bonhaus, D.W., Weinhardt, K.K., Taylor, M., DeSouza, A., McNeeley, P.M., Szczepanski, K.,  
707 Fontana, D.J., Trinh, J., Rocha, C.L., Dawson, M.W., Flippin, L.A., Eglen, R.M., 1997.  
708 RS-102221: a novel high affinity and selective, 5-HT<sub>2C</sub> receptor antagonist.  
709 *Neuropharmacology* 36, 621–629. [https://doi.org/10.1016/s0028-3908\(97\)00049-x](https://doi.org/10.1016/s0028-3908(97)00049-x)
- 710 Brandão, M.L., Zanoveli, J.M., Ruiz-Martinez, R.C., Oliveira, L.C., Landeira-Fernandez, J.,  
711 2008. Different patterns of freezing behavior organized in the periaqueductal gray of  
712 rats: Association with different types of anxiety. *Behav. Brain Res.* 188, 1–13.

- 713 <https://doi.org/10.1016/j.bbr.2007.10.018>
- 714 Castilho, V., Macedo, C., Brandão, M., 2002. Role of benzodiazepine and serotonergic  
715 mechanisms in conditioned freezing and antinociception using electrical stimulation of  
716 the dorsal periaqueductal gray as unconditioned stimulus in rats. *Psychopharmacology*  
717 (Berl.) 165, 77–85. <https://doi.org/10.1007/s00213-002-1246-4>
- 718 Castilho, V.M., Brandão, M.L., 2001. Conditioned antinociception and freezing using electrical  
719 stimulation of the dorsal periaqueductal gray or inferior colliculus as unconditioned  
720 stimulus are differentially regulated by 5-HT<sub>2A</sub> receptors in rats. *Psychopharmacology*  
721 (Berl.) 155, 154–162. <https://doi.org/10.1007/s002130100697>
- 722 Coimbra, N.C., Brandão, M.L., 1997. Effects of 5-HT<sub>2</sub> receptors blockade on fear-induced  
723 analgesia elicited by electrical stimulation of the deep layers of the superior colliculus  
724 and dorsal periaqueductal gray. *Behav. Brain Res.* 87, 97–103.  
725 [https://doi.org/10.1016/S0166-4328\(96\)02267-X](https://doi.org/10.1016/S0166-4328(96)02267-X)
- 726 Conselho Nacional de Controle de Experimentação Animal - CONCEA, 2017. Diretriz brasileira  
727 para o cuidado e a utilização de animais para fins científicos e didáticos - DBCA. Anexo  
728 I. Peixes mantidos em instalações de instituições de ensino ou pesquisa científica,  
729 Resolução Normativa CONCEA nº 34.
- 730 Cornélio, A.M., Nunes-de-Souza, R.L., 2007. Anxiogenic-like effects of mCPP microinfusions  
731 into the amygdala (but not dorsal or ventral hippocampus) in mice exposed to elevated  
732 plus-maze. *Behav. Brain Res.* 178, 82–89. <https://doi.org/10.1016/j.bbr.2006.12.003>
- 733 Daw, N.D., Kakade, S., Dayan, P., 2002. Opponent interactions between serotonin and  
734 dopamine. *Neural Netw.* 15, 603–616. [https://doi.org/10.1016/S0893-6080\(02\)00052-7](https://doi.org/10.1016/S0893-6080(02)00052-7)
- 735 de Mello Cruz, A.P., Pinheiro, G., Alves, S.H., Ferreira, G., Mendes, M., Faria, L., Macedo, C.E.,  
736 Landeira-Fernandez, J., 2005. Behavioral effects of systemically administered MK-212  
737 are prevented by ritanserin microinfusion into the basolateral amygdala of rats exposed  
738 to the elevated plus-maze. *Psychopharmacology (Berl.)* 182, 345–354.  
739 <https://doi.org/10.1007/s00213-005-0108-2>
- 740 de Paula, B.B., Leite-Panissi, C.R.A., 2016. Distinct effect of 5-HT<sub>1A</sub> and 5-HT<sub>2A</sub> receptors in  
741 the medial nucleus of the amygdala on tonic immobility behavior. *Brain Res.* 1643, 152–  
742 158. <https://doi.org/10.1016/j.brainres.2016.04.073>
- 743 do Carmo Silva, R.X., Lima-Maximino, M.G., Maximino, C., 2018a. The aversive brain system of  
744 teleosts: Implications for neuroscience and biological psychiatry. *Neurosci. Biobehav.*  
745 *Rev.* 95, 123–135. <https://doi.org/10.1016/j.neubiorev.2018.10.001>



- 746 do Carmo Silva, R.X., Rocha, S.P., Lima-Maximino, M.G., Maximino, C., 2018b. Extraction of  
747 alarm substance in zebrafish. *protocols.io*. <https://doi.org/10.17504/protocols.io.tr3em8n>
- 748 Ghisleni, G., Capiotti, K.M., Da Silva, R.S., Oses, J.P., Piato, Â.L., Soares, V., Bogo, M.R.,  
749 Bonan, C.D., 2012. The role of CRH in behavioral responses to acute restraint stress in  
750 zebrafish. *Prog. Neuropsychopharmacol. Biol. Psychiatry* 36, 176–182.  
751 <https://doi.org/10.1016/j.pnpbbp.2011.08.016>
- 752 Gomes, F., Greidinger, M., Salviano, M., Couto, K.C., Scaperlli, G.F., Alves, S.H. de S., Cruz,  
753 A.P. de M., 2010. Antidepressant- and anxiogenic-like effects of acute 5-HT<sub>2C</sub> receptor  
754 activation in rats exposed to the forced swim test and elevated plus maze. *Psychol. &*  
755 *Neurosci.* 3, 245–249. <https://doi.org/10.3922/j.psns.2010.2.014>
- 756 Graeff, F.G., 2004. Serotonin, the periaqueductal gray and panic. *Neurosci. Biobehav. Rev.* 28,  
757 239–259. <https://doi.org/10.1016/j.neubiorev.2003.12.004>
- 758 Graeff, F.G., Brandão, M.L., Audi, E.A., Schütz, M.T.B., 1986. Modulation of the brain aversive  
759 system by GABAergic and serotonergic mechanisms. *Behav. Brain Res.* 22, 173–180.  
760 [https://doi.org/10.1016/0166-4328\(86\)90038-0](https://doi.org/10.1016/0166-4328(86)90038-0)
- 761 Herculano, A.M., Maximino, C., 2014. Serotonergic modulation of zebrafish behavior: Towards a  
762 paradox. *Prog. Neuropsychopharmacol. Biol. Psychiatry, Special Issue: Zebrafish*  
763 *models of brain disorders* 55, 50–66. <https://doi.org/10.1016/j.pnpbbp.2014.03.008>
- 764 Höglund, E., Weltzien, F.-A., Schjolden, J., Winberg, S., Ursin, H., Døving, K.B., 2005.  
765 Avoidance behavior and brain monoamines in fish. *Brain Res.* 1032, 104–110.  
766 <https://doi.org/10.1016/j.brainres.2004.10.050>
- 767 Kennett, G.A., Wood, M.D., Bright, F., Trail, B., Riley, G., Holland, V., Avenell, K.Y., Stean, T.,  
768 Upton, N., Bromidge, S., Forbes, I.T., Brown, A.M., Middlemiss, D.N., Blackburn, T.P.,  
769 1997. SB 242084, a Selective and Brain Penetrant 5-HT<sub>2C</sub> Receptor Antagonist.  
770 *Neuropharmacology* 36, 609–620. [https://doi.org/10.1016/S0028-3908\(97\)00038-5](https://doi.org/10.1016/S0028-3908(97)00038-5)
- 771 Kinkel, M.D., Eames, S.C., Philipson, L.H., Prince, V.E., 2010. Intraperitoneal Injection into  
772 Adult Zebrafish. *JoVE J. Vis. Exp.* e2126. <https://doi.org/10.3791/2126>
- 773 Knight, A.R., Misra, A., Quirk, K., Benwell, K., Revell, D., Kennett, G., Bickerdike, M., 2004.  
774 Pharmacological characterisation of the agonist radioligand binding site of 5-HT<sub>2A</sub>, 5-  
775 HT<sub>2B</sub> and 5-HT<sub>2C</sub> receptors. *Naunyn. Schmiedebergs Arch. Pharmacol.* 370, 114–123.  
776 <https://doi.org/10.1007/s00210-004-0951-4>
- 777 Kuznetsova, E.G., Amstislavskaya, T.G., Shefer, E.A., Popova, N.K., 2006. Effect of 5-HT<sub>2C</sub>  
778 receptor antagonist RS 102221 on mouse behavior. *Bull. Exp. Biol. Med.* 142, 76–79.

- 779 <https://doi.org/10.1007/s10517-006-0296-8>
- 780 Lima-Maximino, M., Pyterson, M.P., Silva, R.X. do C., Gomes, G.C.V., Rocha, S.P., Herculano,  
781 A.M., Rosemberg, D.B., Maximino, C., 2020. Phasic and tonic serotonin modulate alarm  
782 reactions and post-exposure behavior in zebrafish. *J. Neurochem.* 153, 495–509. [https://](https://doi.org/10.1111/jnc.14978)  
783 [doi.org/10.1111/jnc.14978](https://doi.org/10.1111/jnc.14978)
- 784 Macedo, C.E., Martinez, R.C.R., Albrechet-Souza, L., Molina, V.A., Brandão, M.L., 2007. 5-  
785 HT2- and D1-mechanisms of the basolateral nucleus of the amygdala enhance  
786 conditioned fear and impair unconditioned fear. *Behav. Brain Res.* 177, 100–108. [https://](https://doi.org/10.1016/j.bbr.2006.10.031)  
787 [doi.org/10.1016/j.bbr.2006.10.031](https://doi.org/10.1016/j.bbr.2006.10.031)
- 788 Martin, J.R., Ballard, T.M., Higgins, G.A., 2002. Influence of the 5-HT<sub>2C</sub> receptor antagonist,  
789 SB-242084, in tests of anxiety. *Pharmacol. Biochem. Behav., Serotonin: Pharmacology,*  
790 *Biochemistry & Behaviour* 71, 615–625. [https://doi.org/10.1016/S0091-3057\(01\)00713-4](https://doi.org/10.1016/S0091-3057(01)00713-4)
- 791 Mathuru, A.S., Kibat, C., Cheong, W.F., Shui, G., Wenk, M.R., Friedrich, R.W., Jesuthasan, S.,  
792 2012. Chondroitin Fragments Are Odorants that Trigger Fear Behavior in Fish. *Curr.*  
793 *Biol.* 22, 538–544. <https://doi.org/10.1016/j.cub.2012.01.061>
- 794 Matthews, M., Varga, Z.M., 2012. Anesthesia and Euthanasia in Zebrafish. *ILAR J.* 53, 192–  
795 204. <https://doi.org/10.1093/ilar.53.2.192>
- 796 Maximino, C., do Carmo Silva, R.X., Campos, K. dos S., Oliveira, J.S. de, Rocha, S.P.,  
797 Pyterson, M.P., Souza, D.P. dos S., Feitosa, L.M., Ikeda, S.R., Pimentel, A.F.N., Ramos,  
798 P.N.F., Costa, B.P.D., Herculano, A.M., Rosemberg, D.B., Siqueira □ Silva, D.H., Lima-  
799 Maximino, M., 2019. Sensory ecology of ostariophysan alarm substances. *J. Fish Biol.*  
800 95, 274–286. <https://doi.org/10.1111/jfb.13844>
- 801 Maximino, C., Lima, M.G., Costa, C.C., Guedes, I.M.L., Herculano, A.M., 2014. Fluoxetine and  
802 WAY 100,635 dissociate increases in scototaxis and analgesia induced by conspecific  
803 alarm substance in zebrafish (*Danio rerio* Hamilton 1822). *Pharmacol. Biochem. Behav.*  
804 124, 425–433. <https://doi.org/10.1016/j.pbb.2014.07.003>
- 805 Mora, P.O., Netto, C.F., Graeff, F.G., 1997. Role of 5-HT<sub>2A</sub> and 5-HT<sub>2C</sub> Receptor Subtypes in  
806 the Two Types of Fear Generated by the Elevated T-Maze. *Pharmacol. Biochem.*  
807 *Behav.* 58, 1051–1057. [https://doi.org/10.1016/S0091-3057\(97\)00057-9](https://doi.org/10.1016/S0091-3057(97)00057-9)
- 808 Nathan, F.M., Ogawa, S., Parhar, I.S., 2015. Kisspeptin1 modulates odorant-evoked fear  
809 response via two serotonin receptor subtypes (5-HT<sub>1A</sub> and 5-HT<sub>2</sub>) in zebrafish. *J.*  
810 *Neurochem.* 133, 870–878. <https://doi.org/10.1111/jnc.13105>
- 811 Nunes-de-Souza, V., Nunes-de-Souza, R.L., Rodgers, R.J., Canto-de-Souza, A., 2008. 5-HT<sub>2</sub>

- 812 receptor activation in the midbrain periaqueductal grey (PAG) reduces anxiety-like  
813 behaviour in mice. *Behav. Brain Res.* 187, 72–79.  
814 <https://doi.org/10.1016/j.bbr.2007.08.030>
- 815 Oliveira, L.C., Broiz, A.C., de Macedo, C.E., Landeira-Fernandez, J., Brandão, M.L., 2007. 5-  
816 HT2 receptor mechanisms of the dorsal periaqueductal gray in the conditioned and  
817 unconditioned fear in rats. *Psychopharmacology (Berl.)* 191, 253–262.  
818 <https://doi.org/10.1007/s00213-006-0653-3>
- 819 Parra, K.V., Adrian, J.C., Gerlai, R., 2009. The synthetic substance hypoxanthine 3-N-oxide  
820 elicits alarm reactions in zebrafish (*Danio rerio*). *Behav. Brain Res.* 205, 336–341.  
821 <https://doi.org/10.1016/j.bbr.2009.06.037>
- 822 Perusini, J.N., Fanselow, M.S., 2015. Neurobehavioral perspectives on the distinction between  
823 fear and anxiety. *Learn. Mem.* 22, 417–425. <https://doi.org/10.1101/lm.039180.115>
- 824 Piato, A.L., Rosemberg, D.B., Capiotti, K.M., Siebel, A.M., Herrmann, A.P., Ghisleni, G., Vianna,  
825 M.R., Bogo, M.R., Lara, D.R., Bonan, C.D., 2011. Acute Restraint Stress in Zebrafish:  
826 Behavioral Parameters and Purinergic Signaling. *Neurochem. Res.* 36, 1876.  
827 <https://doi.org/10.1007/s11064-011-0509-z>
- 828 Quadros, V.A., Costa, F.V., Canzian, J., Nogueira, C.W., Rosemberg, D.B., 2018. Modulatory  
829 role of conspecific alarm substance on aggression and brain monoamine oxidase activity  
830 in two zebrafish populations. *Prog. Neuropsychopharmacol. Biol. Psychiatry* 86, 322–  
831 330. <https://doi.org/10.1016/j.pnpbp.2018.03.018>
- 832 Quadros, V.A., Silveira, A., Giuliani, G.S., Didonet, F., Silveira, A.S., Nunes, M.E., Silva, T.O.,  
833 Loro, V.L., Rosemberg, D.B., 2016. Strain- and context-dependent behavioural  
834 responses of acute alarm substance exposure in zebrafish. *Behav. Processes* 122, 1–  
835 11. <https://doi.org/10.1016/j.beproc.2015.10.014>
- 836 Rosenzweig-Lipson, S., Zhang, J., Mazandarani, H., Harrison, B.L., Sabb, A., Sabalski, J.,  
837 Stack, G., Welmaker, G., Barrett, J.E., Dunlop, J., 2006. Antiobesity-like effects of the 5-  
838 HT2C receptor agonist WAY-161503. *Brain Res.* 1073–1074, 240–251.  
839 <https://doi.org/10.1016/j.brainres.2005.12.052>
- 840 Salchner, P., Singewald, N., 2006. 5-HT receptor subtypes involved in the anxiogenic-like action  
841 and associated Fos response of acute fluoxetine treatment in rats. *Psychopharmacology*  
842 (Berl.) 185, 282–288. <https://doi.org/10.1007/s00213-005-0247-5>
- 843 Silva, P.I.M., Martins, C.I.M., Khan, U.W., Gjøen, H.M., Øverli, Ø., Höglund, E., 2015. Stress  
844 and fear responses in the teleost pallium. *Physiol. Behav.* 141, 17–22.

- 845 <https://doi.org/10.1016/j.physbeh.2014.12.020>
- 846 Silva, R.X. do C., Rocha, S.P., Herculano, A.M., Lima-Maximino, M.G., Maximino, C., 2020.
- 847 Animal models for panic disorder. *Psychol. Neurosci.* 13, 1–18.
- 848 <https://doi.org/10.1037/pne0000177>
- 849 Smith, R.J.F., 1992. Alarm signals in fishes. *Rev. Fish Biol. Fish.* 2, 33–63.
- 850 <https://doi.org/10.1007/BF00042916>
- 851 Sourbron, J., Schneider, H., Kecskés, A., Liu, Y., Buening, E.M., Lagae, L., Smolders, I., de
- 852 Witte, P., 2016. Serotonergic Modulation as Effective Treatment for Dravet Syndrome in
- 853 a Zebrafish Mutant Model. *ACS Chem. Neurosci.* 7, 588–598.
- 854 <https://doi.org/10.1021/acschemneuro.5b00342>
- 855 Speedie, N., Gerlai, R., 2008. Alarm substance induced behavioral responses in zebrafish
- 856 (*Danio rerio*). *Behav. Brain Res.* 188, 168–177. <https://doi.org/10.1016/j.bbr.2007.10.031>
- 857 von Frisch, K., 1938. Zur Psychologie des Fisch-Schwarmes. *Naturwissenschaften* 26, 601–
- 858 606. <https://doi.org/10.1007/BF01590598>
- 859 Wolf, K., 1963. Physiological Salines for Fresh-Water Teleosts. *Progress. Fish-Cult.* 25, 135–
- 860 140. [https://doi.org/10.1577/1548-8659\(1963\)25\[135:PSFFT\]2.0.CO;2](https://doi.org/10.1577/1548-8659(1963)25[135:PSFFT]2.0.CO;2)

## 861 Figure captions

862 Figure 1 – Experimental designs for (A) experiment 1 (CAS-elicited behavioral responses and  
863 post-exposure behavior) and (B) experiment 2 (ARS-elicited behavioral responses).

864 *Abbreviations:* ARS – acute restraint stress; CAS – conspecific alarm substance; VEH –  
865 vehicle

866 Figure 2 – Effects of MK-212 on behavior during CAS exposure. (A) Time spent on top third of  
867 the tank. (B) Time spent on bottom third of the tank. (C) Erratic swimming. (D) Total time  
868 spent freezing. (E) Swimming speed. Different letters represent statistical differences at  
869 the  $p < 0.05$  level; similar letters indicate lack of statistically significant differences. Data  
870 are presented as individual data points (dots) superimposed over the median  $\pm$   
871 interquartile ranges. Dashed lines on panels A and B represent change levels. Dots  
872 connected by lines represent group means. CTRL = controls (water-exposed animals);  
873 CAS = conspecific alarm substance. Final sample sizes: CTRL + VEH:  $n = 15$  animals;  
874 CTRL + 1 mg/kg MK-212:  $n = 21$  animals; CTRL + 2 mg/kg MK-212:  $n = 21$  animals;  
875 CAS + VEH:  $n = 21$  animals; CAS + 1 mg/kg MK-212:  $n = 21$  animals; CAS + 2 mg/kg  
876 MK-212:  $n = 21$  animals.

877 Figure 3 – Effects of MK-212 on behavior after CAS exposure. (A) Time spent on top third of the  
878 tank. (B) Time spent on bottom third of the tank. (C) Erratic swimming. (D) Total time  
879 spent freezing. (E) Swimming speed. Different letters represent statistical differences at  
880 the  $p < 0.05$  level; similar letters indicate lack of statistically significant differences. Data  
881 are presented as individual data points (dots) superimposed over the median  $\pm$   
882 interquartile ranges. Dashed lines on panels A and B represent change levels. Dots  
883 connected by lines represent group means. CTRL = controls (water-exposed animals);  
884 CAS = conspecific alarm substance. Final sample sizes: CTRL + VEH:  $n = 15$  animals;  
885 CTRL + 1 mg/kg MK-212:  $n = 21$  animals; CTRL + 2 mg/kg MK-212:  $n = 21$  animals;  
886 CAS + VEH:  $n = 21$  animals; CAS + 1 mg/kg MK-212:  $n = 21$  animals; CAS + 2 mg/kg  
887 MK-212:  $n = 21$  animals.

888 Figure 4 – Effects of WAY-161503 on behavior during CAS exposure. (A) Time spent on top  
889 third of the tank. (B) Time spent on bottom third of the tank. (C) Erratic swimming. (D)  
890 Total time spent freezing. (E) Swimming speed. Different letters represent statistical

892 differences at the  $p < 0.05$  level; similar letters indicate lack of statistically significant  
893 differences. Data are presented as individual data points (dots) superimposed over the  
894 median  $\pm$  interquartile ranges. Dashed lines on panels A and B represent change levels.  
895 Dots connected by lines represent group means. CTRL = controls (water-exposed  
896 animals); CAS = conspecific alarm substance. Final sample sizes: CTRL + VEH:  $n = 10$   
897 animals; CTRL + 1 mg/kg WAY-161503:  $n = 21$  animals; CAS + VEH:  $n = 21$  animals;  
898 CAS + 1 mg/kg WAY-161503:  $n = 21$  animals.

899 Figure 5 – Effects of WAY-161503 on behavior after CAS exposure. (A) Time spent on top third  
900 of the tank. (B) Time spent on bottom third of the tank. (C) Erratic swimming. (D) Total  
901 time spent freezing. (E) Swimming speed. Different letters represent statistical  
902 differences at the  $p < 0.05$  level; similar letters indicate lack of statistically significant  
903 differences. Data are presented as individual data points (dots) superimposed over the  
904 median  $\pm$  interquartile ranges. Dashed lines on panels A and B represent change levels.  
905 Dots connected by lines represent group means. CTRL = controls (water-exposed  
906 animals); CAS = conspecific alarm substance. Final sample sizes: CTRL + VEH:  $n = 10$   
907 animals; CTRL + 1 mg/kg WAY-161503:  $n = 21$  animals; CAS + VEH:  $n = 21$  animals;  
908 CAS + 1 mg/kg WAY-161503:  $n = 21$  animals.

909 Figure 6 – Effects of RS-10221 on behavior during CAS exposure. (A) Time spent on top third of  
910 the tank. (B) Time spent on bottom third of the tank. (C) Erratic swimming. (D) Total time  
911 spent freezing. (E) Swimming speed. Different letters represent statistical differences at  
912 the  $p < 0.05$  level; similar letters indicate lack of statistically significant differences. Data  
913 are presented as individual data points (dots) superimposed over the median  $\pm$   
914 interquartile ranges. Dashed lines on panels A and B represent change levels. Dots  
915 connected by lines represent group means. CTRL = controls (water-exposed animals);  
916 CAS = conspecific alarm substance. Final sample sizes: CTRL + VEH:  $n = 10$  animals;  
917 CTRL + 2 mg/kg RS-10221:  $n = 21$  animals; CAS + VEH:  $n = 20$  animals; CAS + 2  
918 mg/kg RS-10221:  $n = 21$  animals.

919 Figure 7 – Effects of RS-10221 on behavior after CAS exposure. (A) Time spent on top third of  
920 the tank. (B) Time spent on bottom third of the tank. (C) Erratic swimming. (D) Total time  
921 spent freezing. (E) Swimming speed. Different letters represent statistical differences at  
922 the  $p < 0.05$  level; similar letters indicate lack of statistically significant differences. Data  
923 are presented as individual data points (dots) superimposed over the median  $\pm$   
924 interquartile ranges. Dashed lines on panels A and B represent change levels. Dots

925 connected by lines represent group means. CTRL = controls (water-exposed animals);  
926 CAS = conspecific alarm substance. Final sample sizes: CTRL + VEH: n = 10 animals;  
927 CTRL + 2 mg/kg RS-10221: n = 21 animals; CAS + VEH: n = 20 animals; CAS + 2  
928 mg/kg RS-10221: n = 21 animals.

929 Figure 8 – Effects of MK-212 on behavior after acute restraint stress (ARS). (A) Time spent on  
930 top third of the tank. (B) Time spent on bottom third of the tank. (C) Erratic swimming.  
931 (D) Total time spent freezing. (E) Swimming speed. Different letters represent statistical  
932 differences at the  $p < 0.05$  level; similar letters indicate lack of statistically significant  
933 differences. Data are presented as individual data points (dots) superimposed over the  
934 median  $\pm$  interquartile ranges. Dashed lines on panels A and B represent change levels.  
935 Dots connected by lines represent group means. CTRL = controls (water-exposed  
936 animals); ARS = acute restraint stress. Final sample sizes: CTRL + VEH: n = 8 animals;  
937 CTRL + 2 mg/kg MK-212: n = 5 animals; ARS + VEH: n = 6 animals; ARS + 2 mg/kg  
938 MK-212: n = 8 animals.



**A**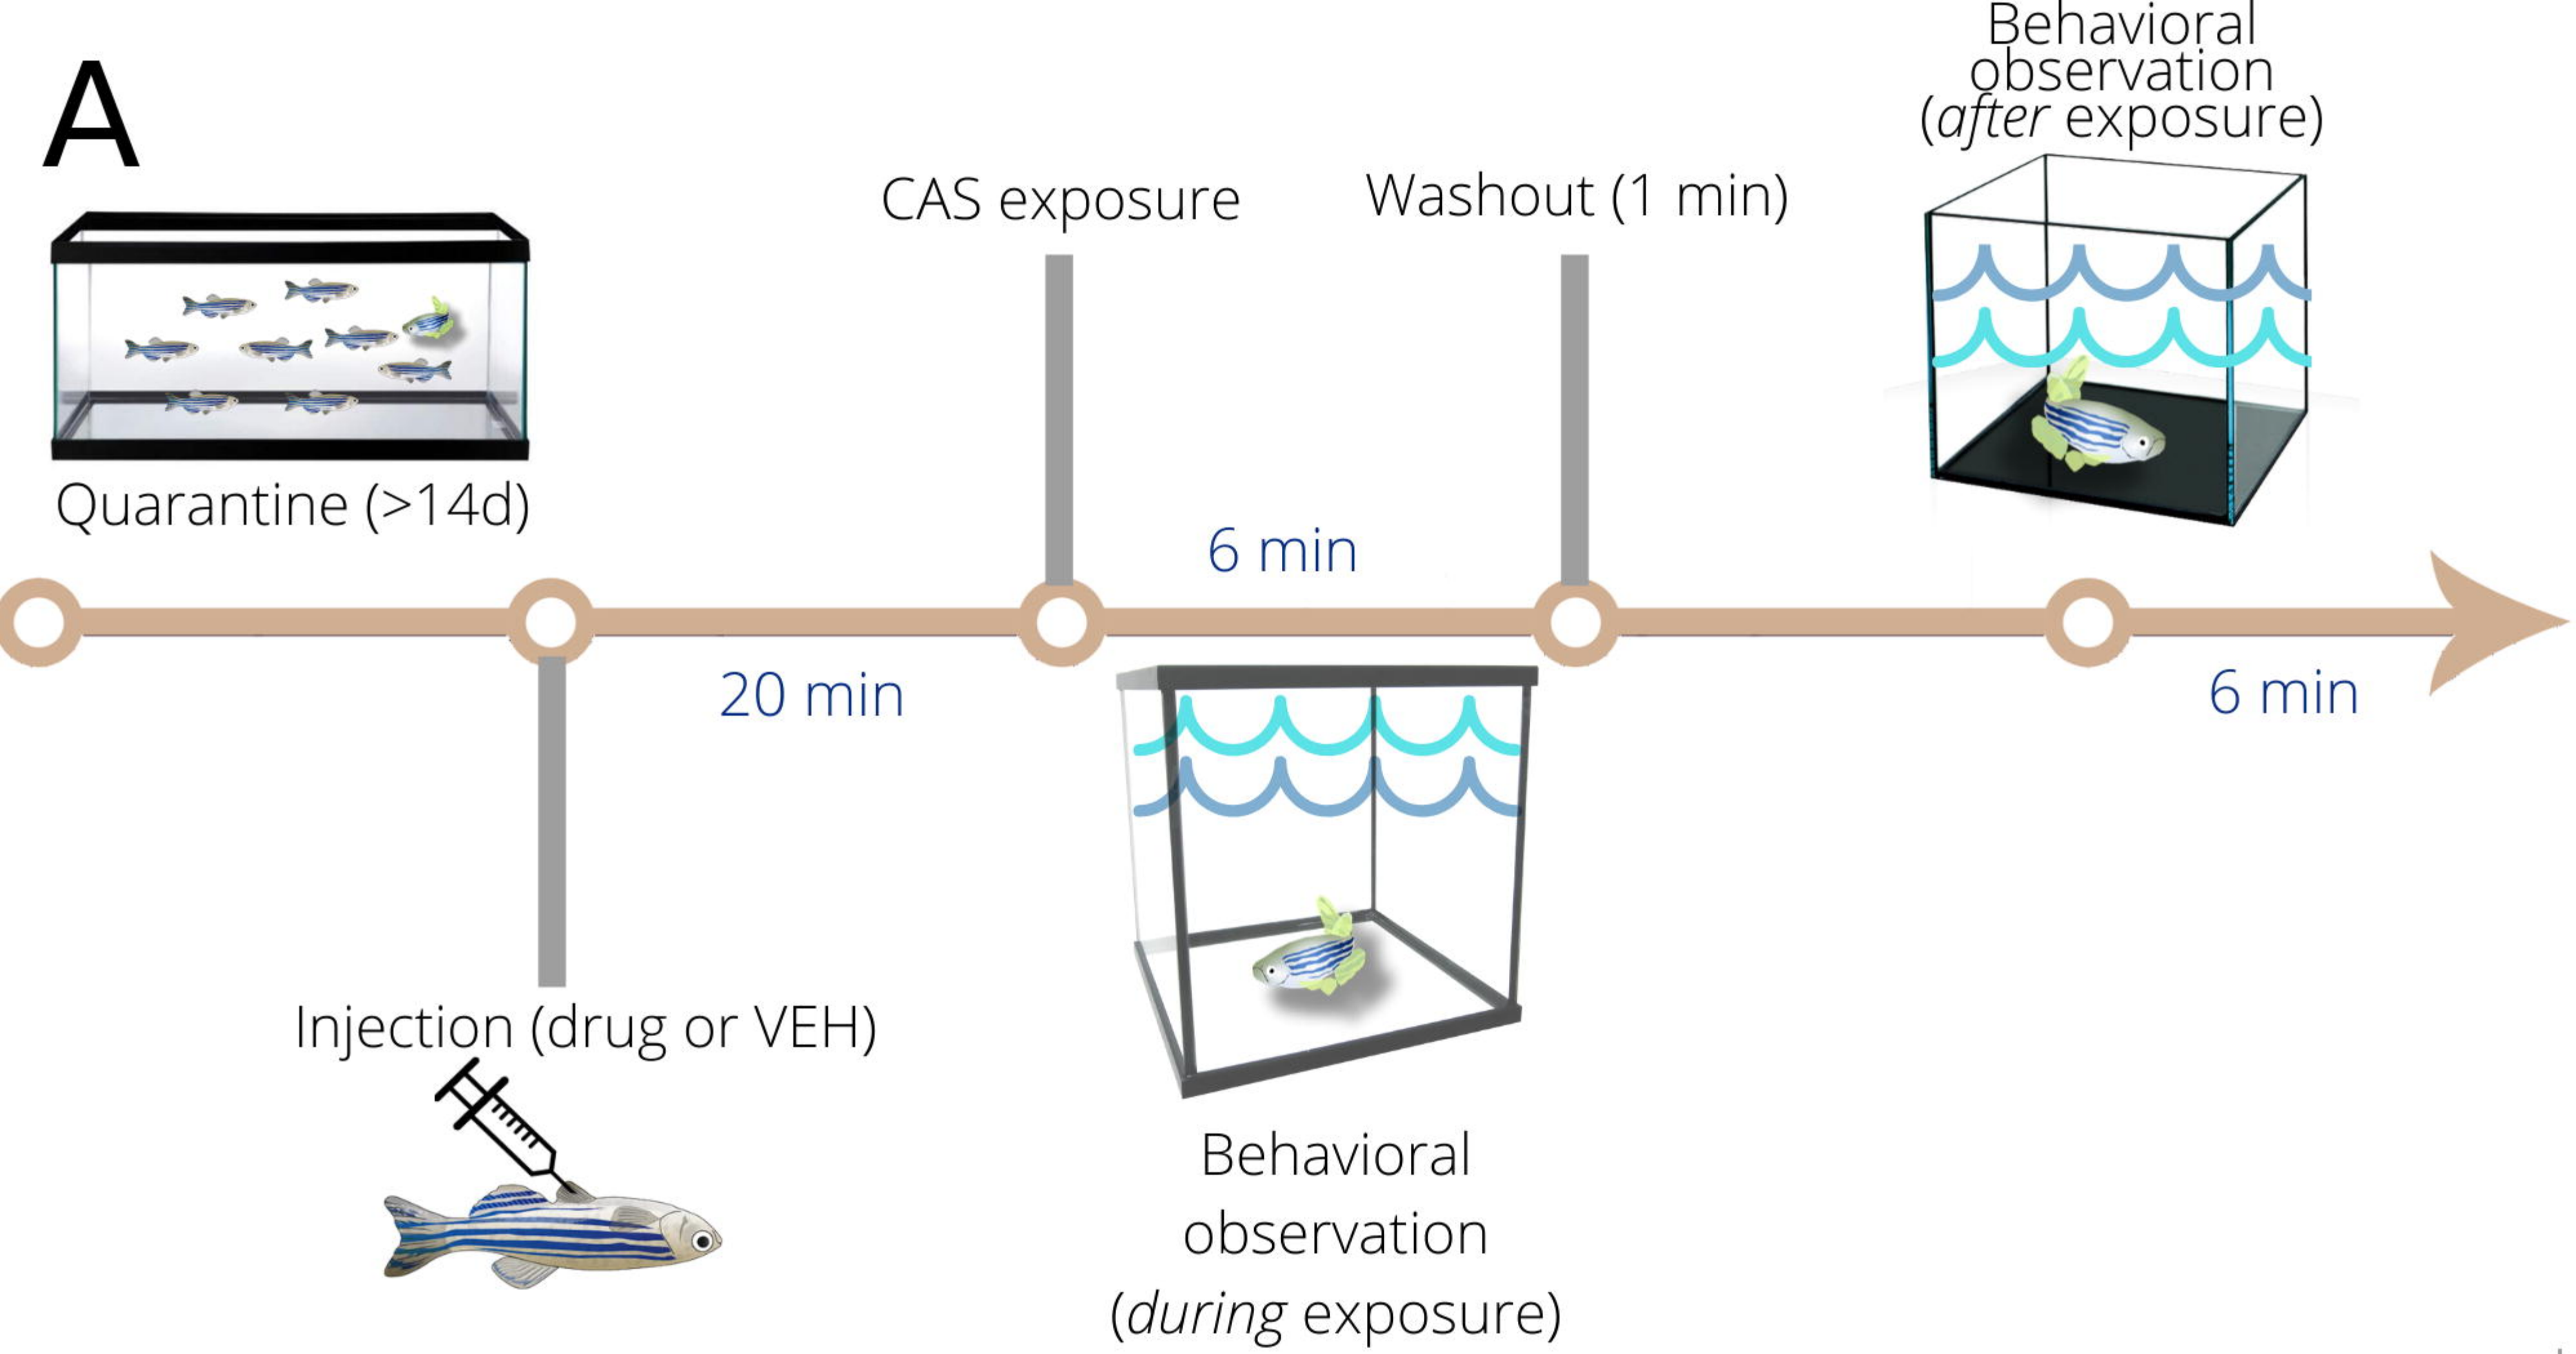**B**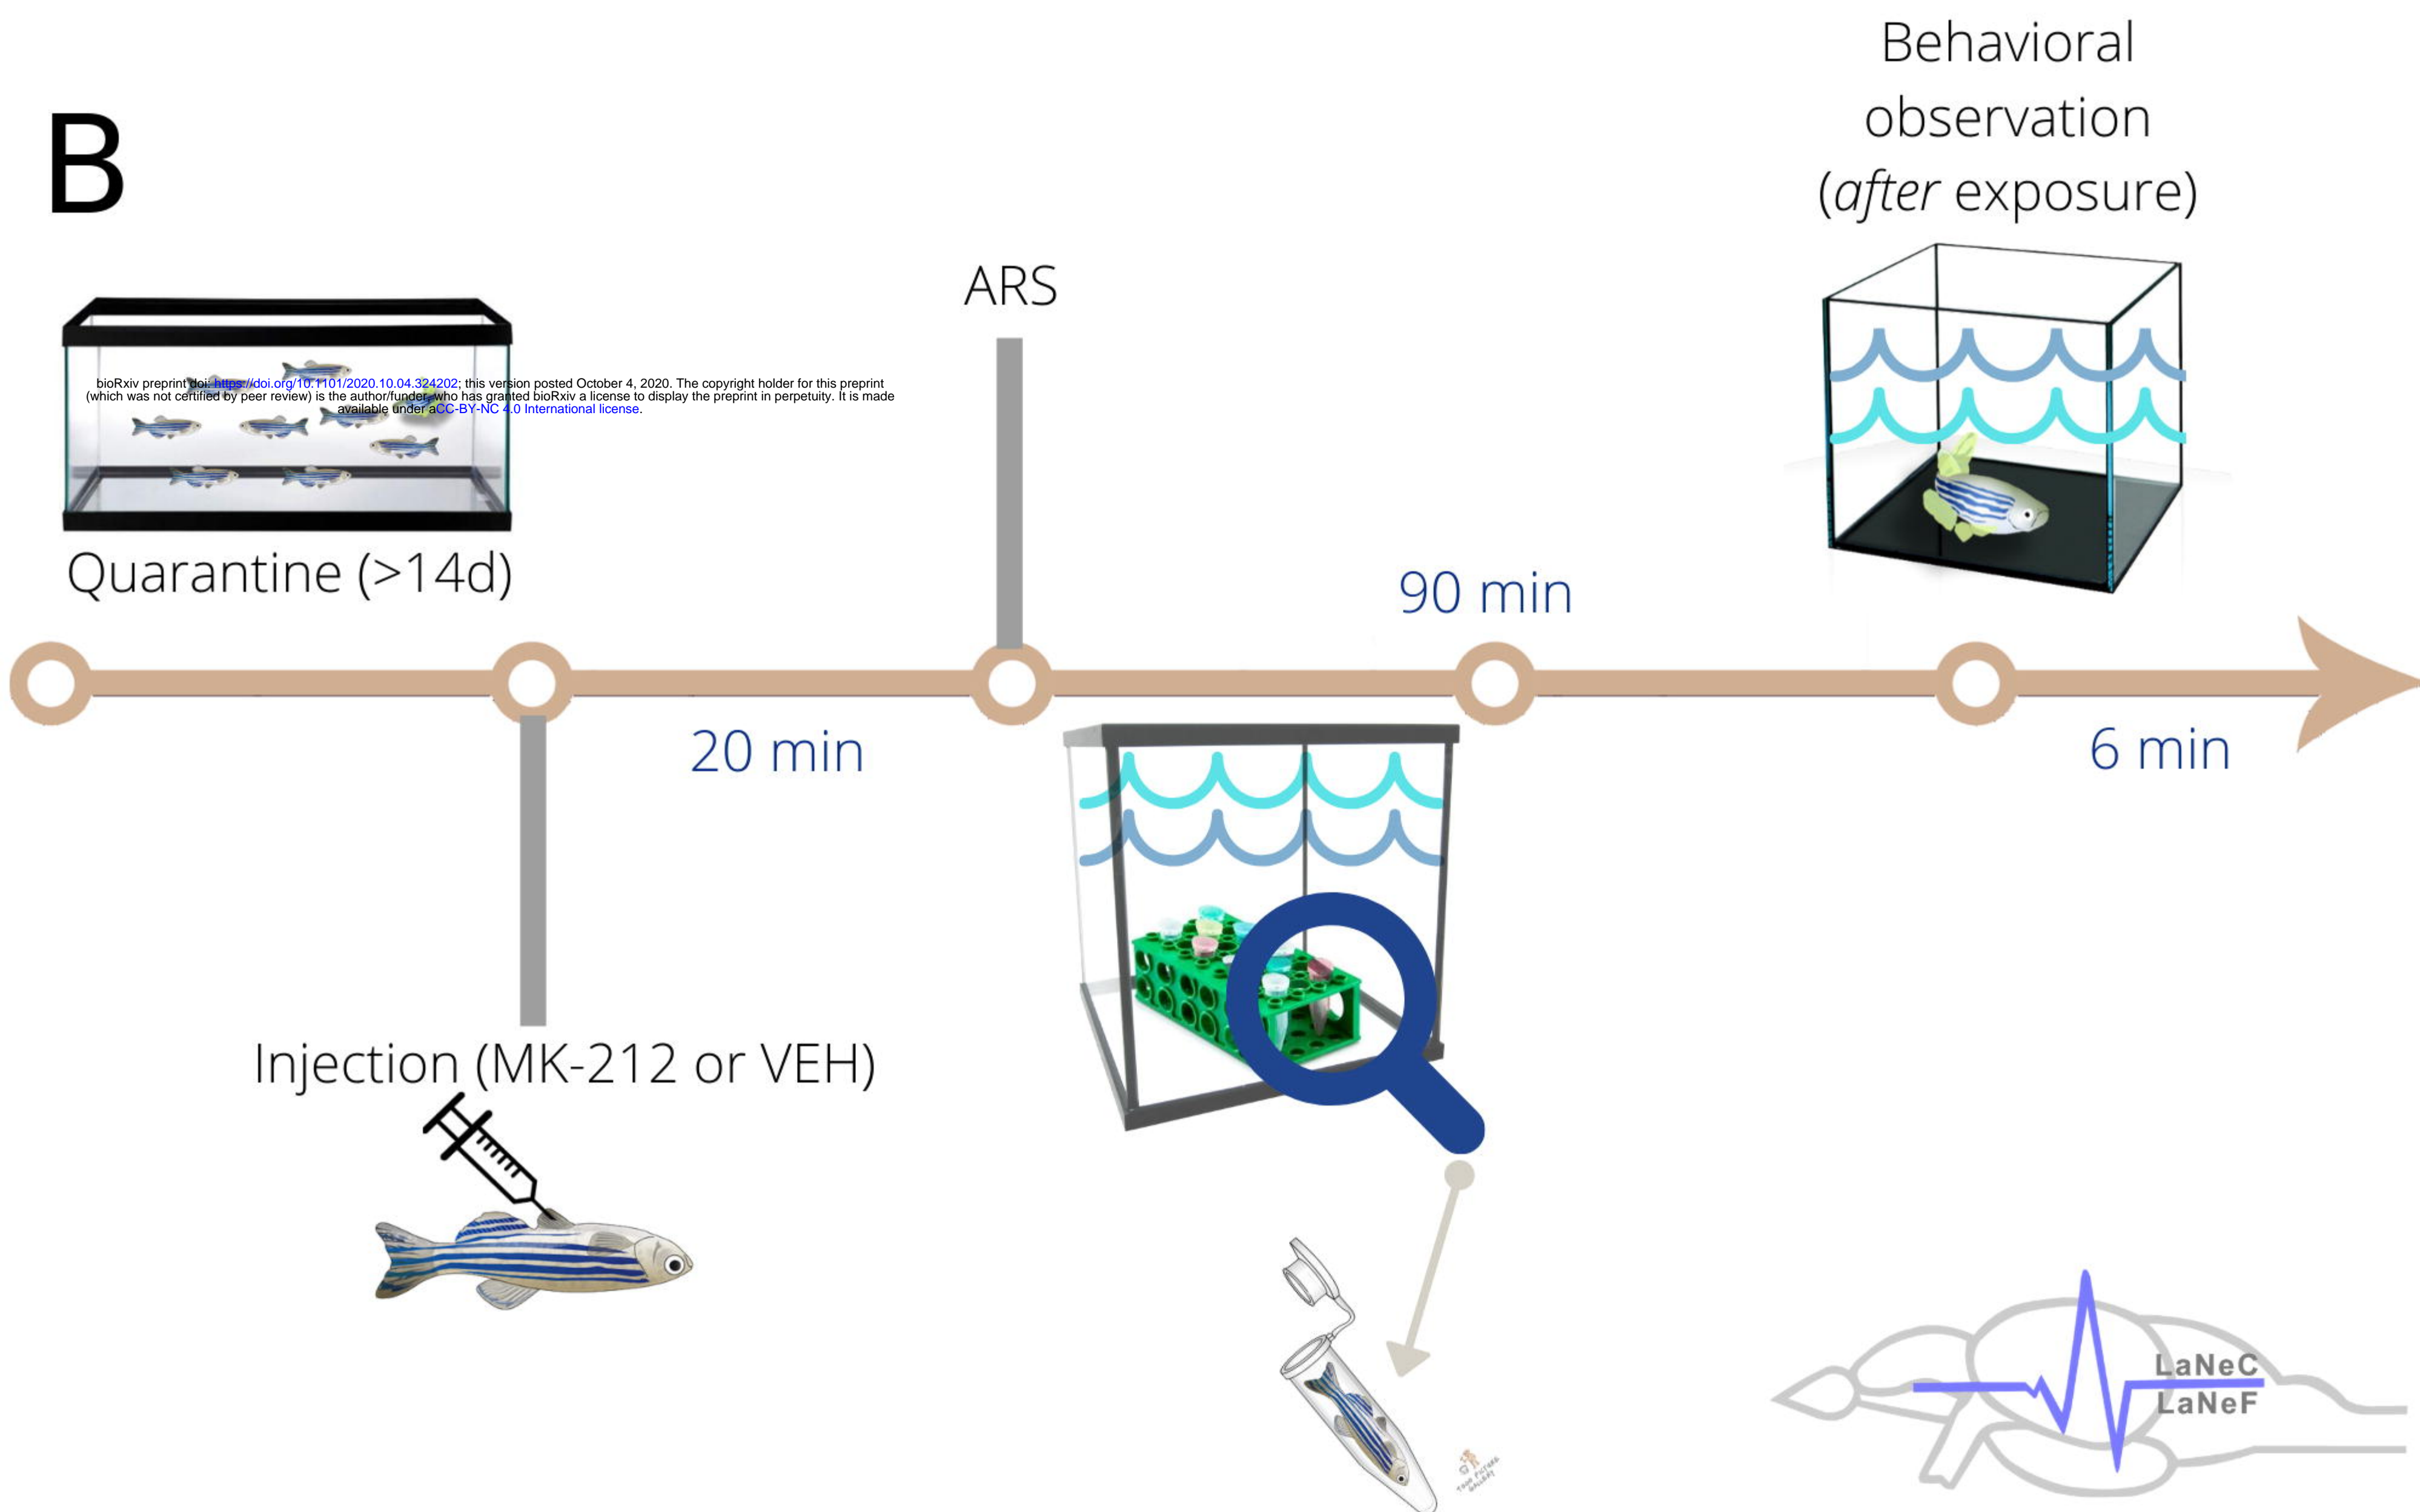



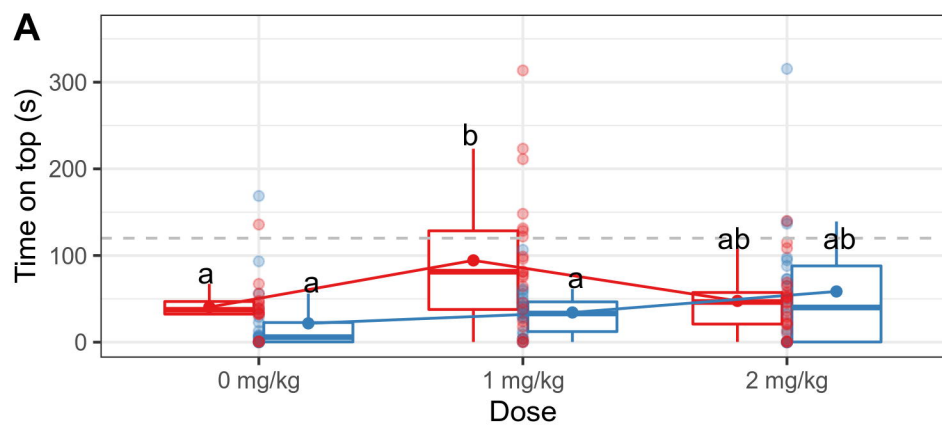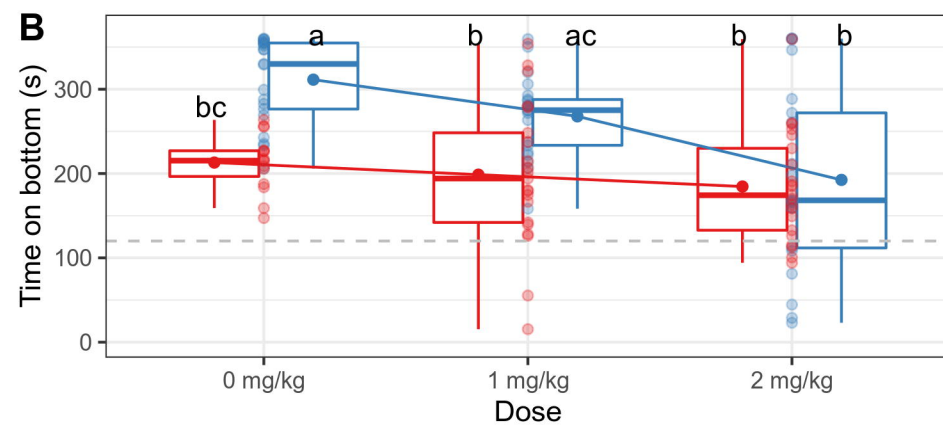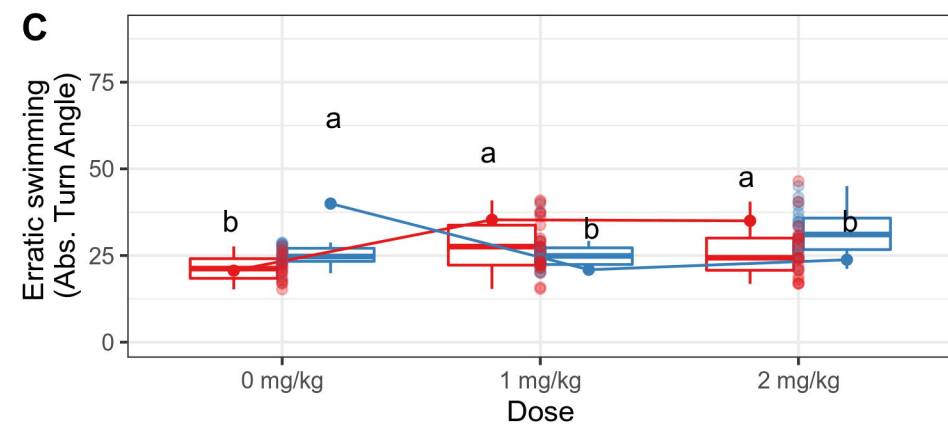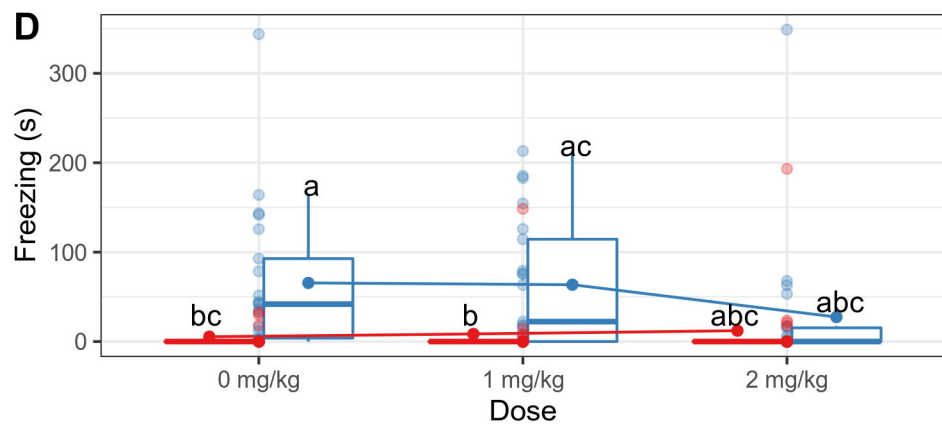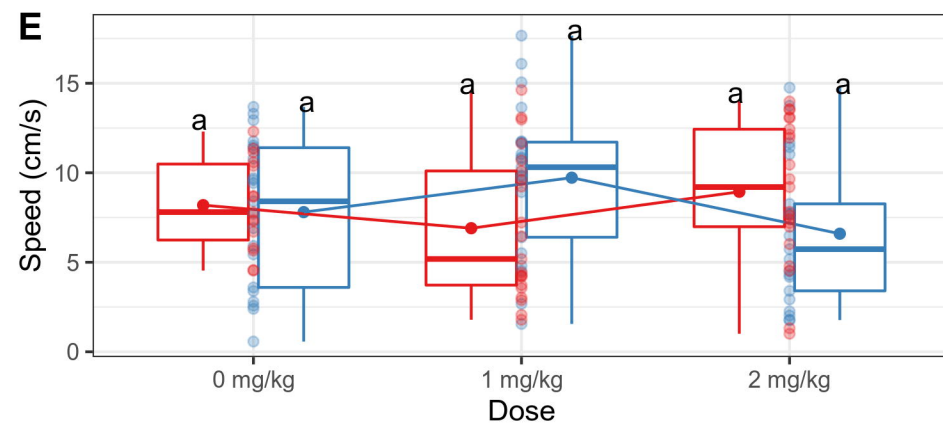

Treatment  CTRL  CAS

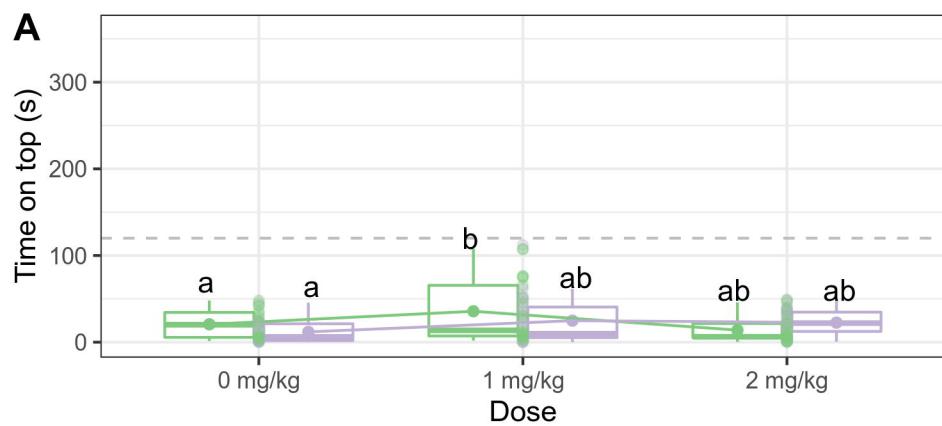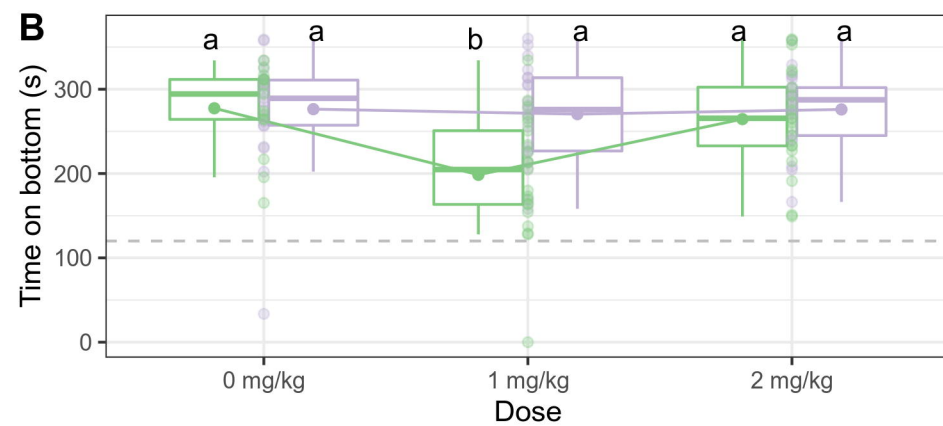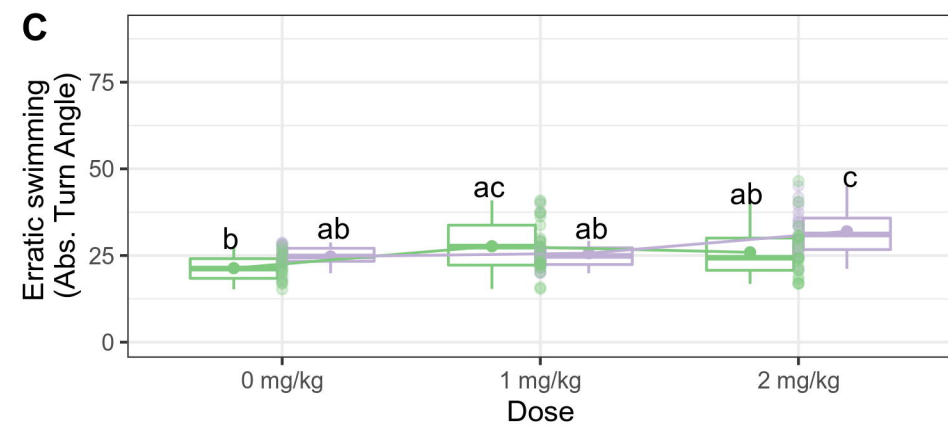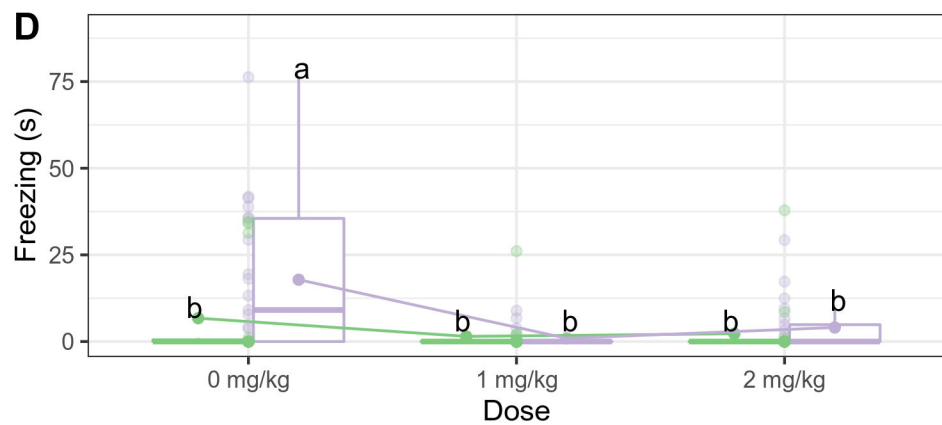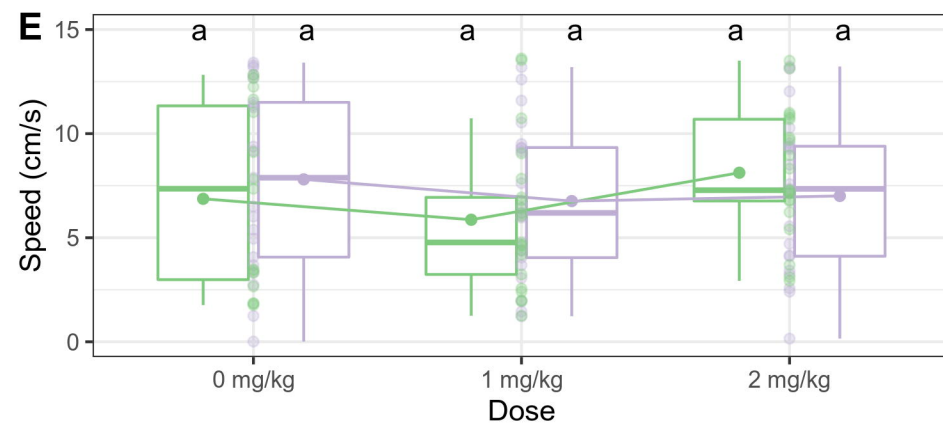

Treatment  CTRL  CAS

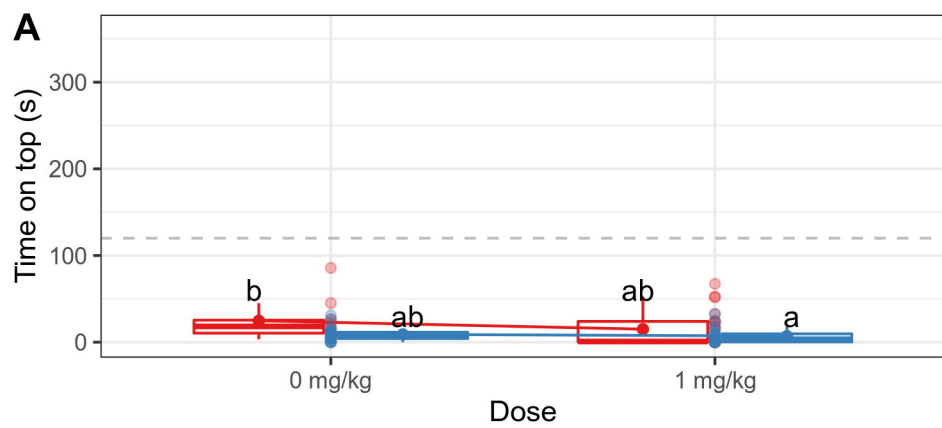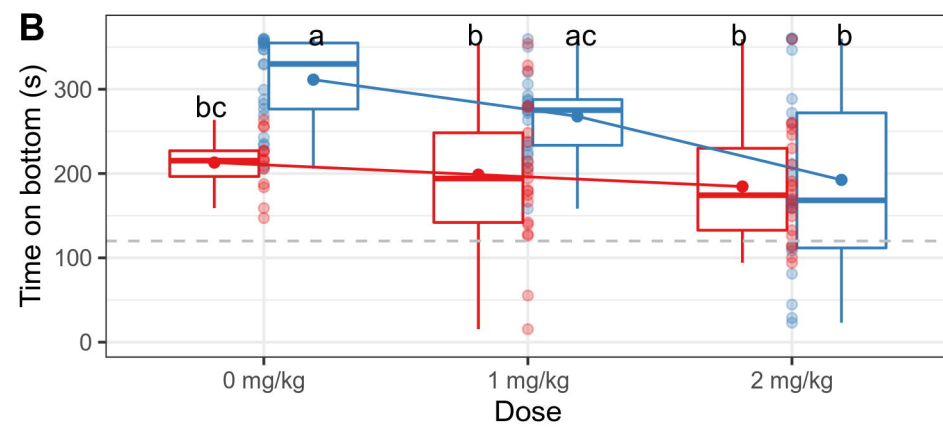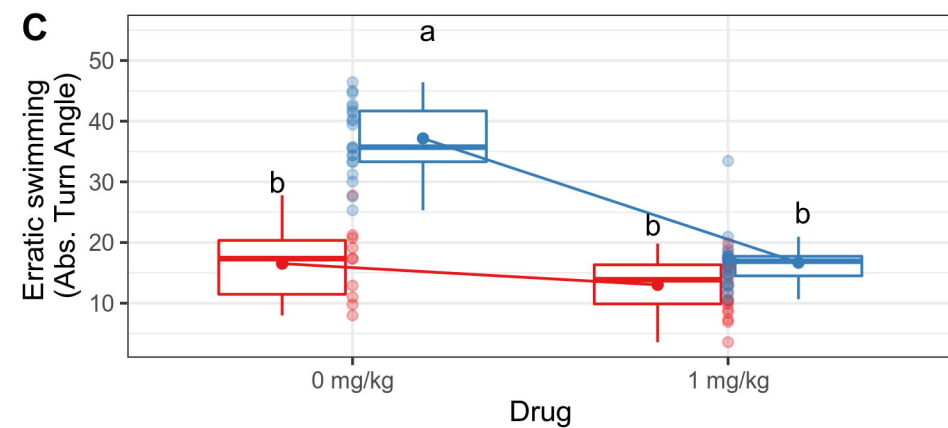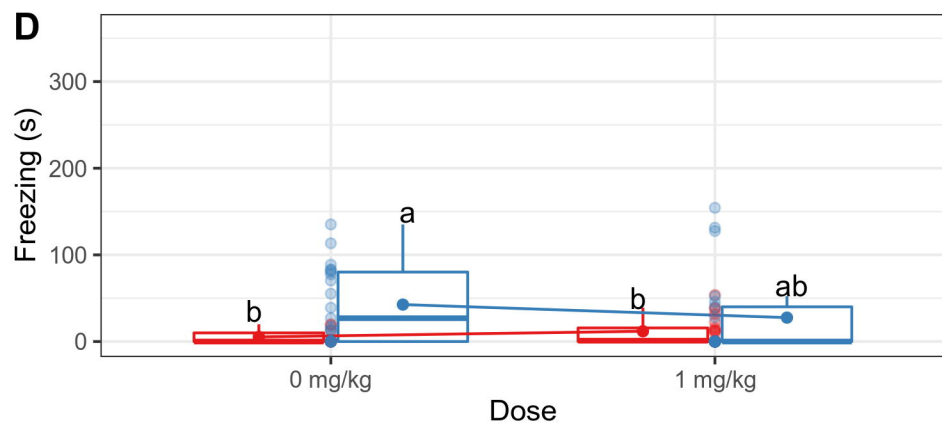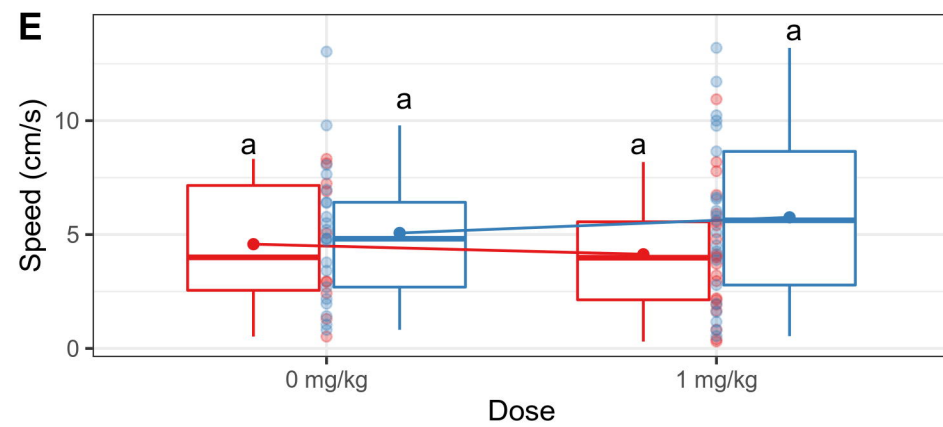

Treatment  CTRL  CAS

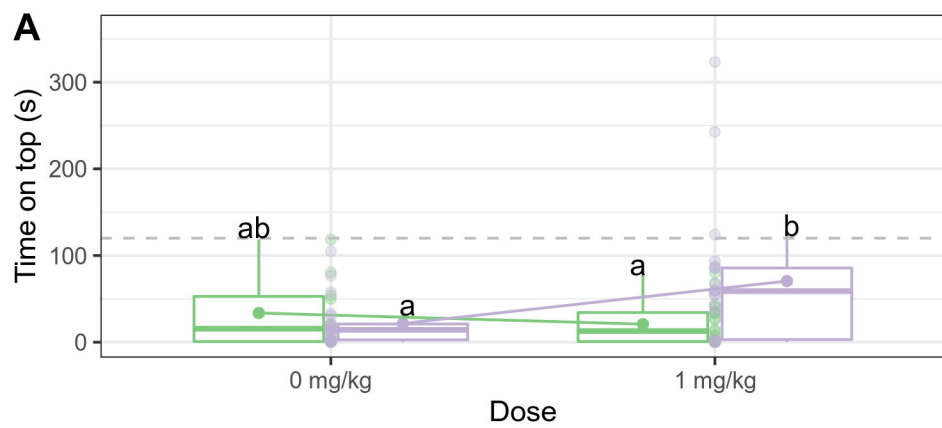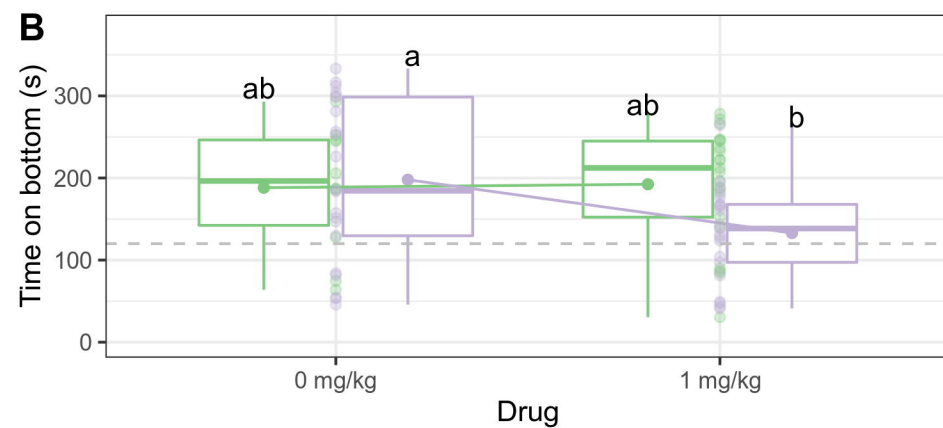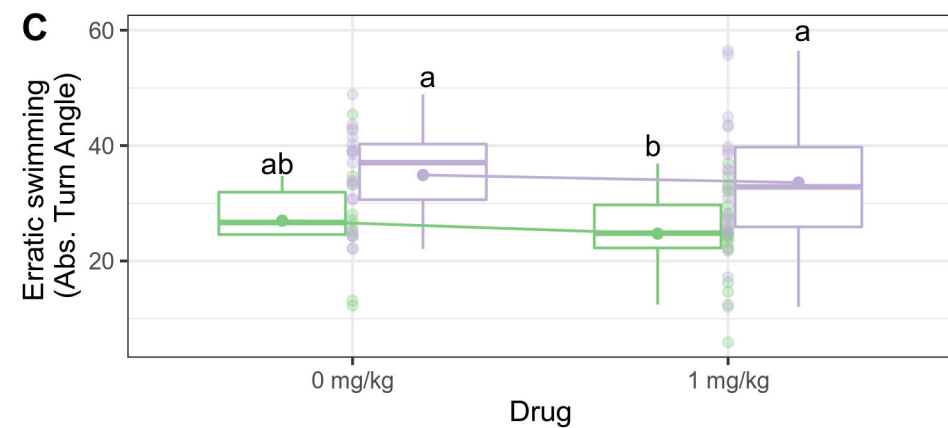

Treatment █ CTRL █ CAS

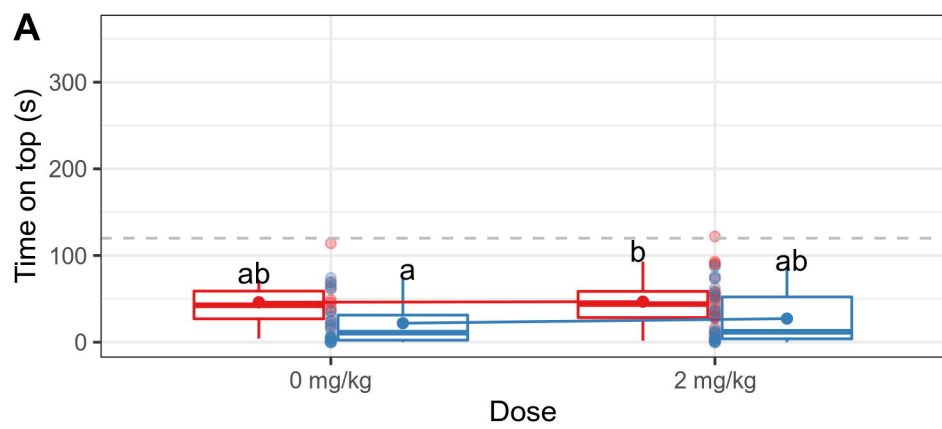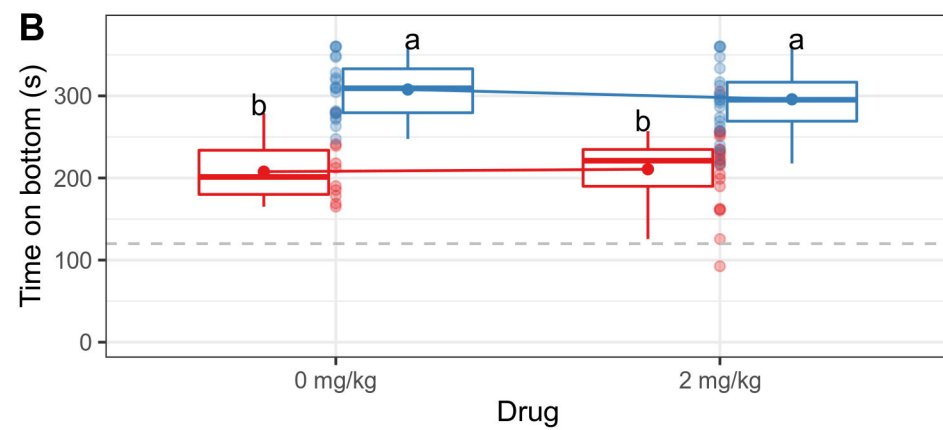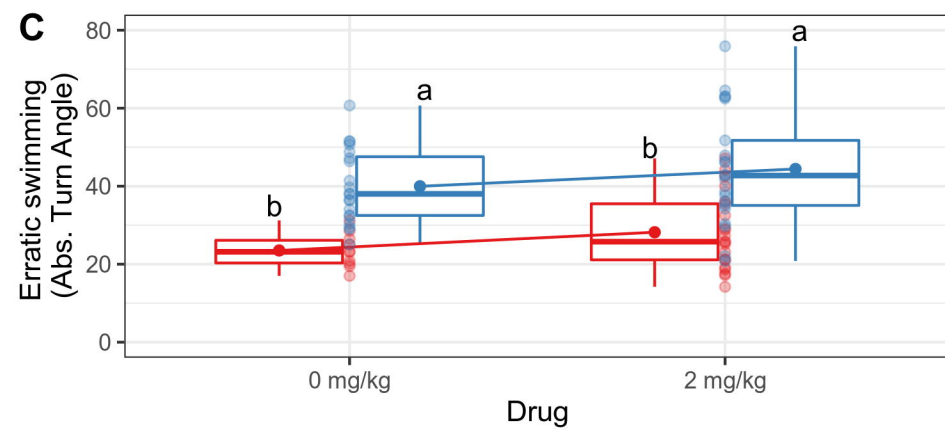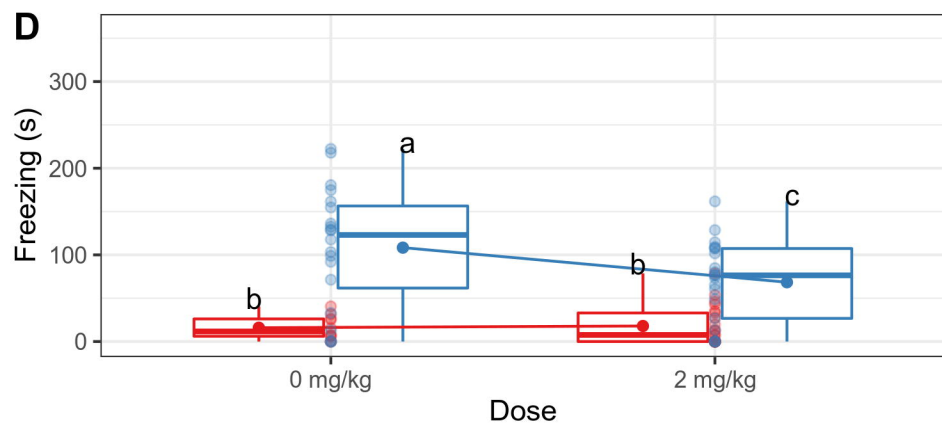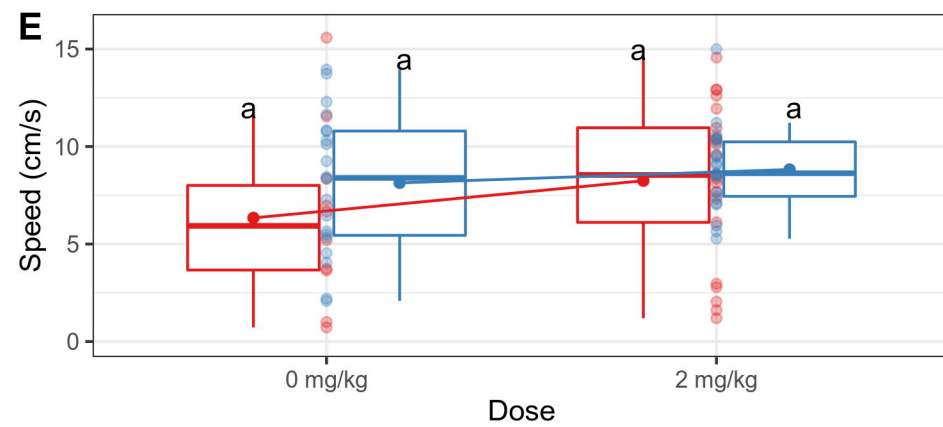

Treatment  CTRL  CAS

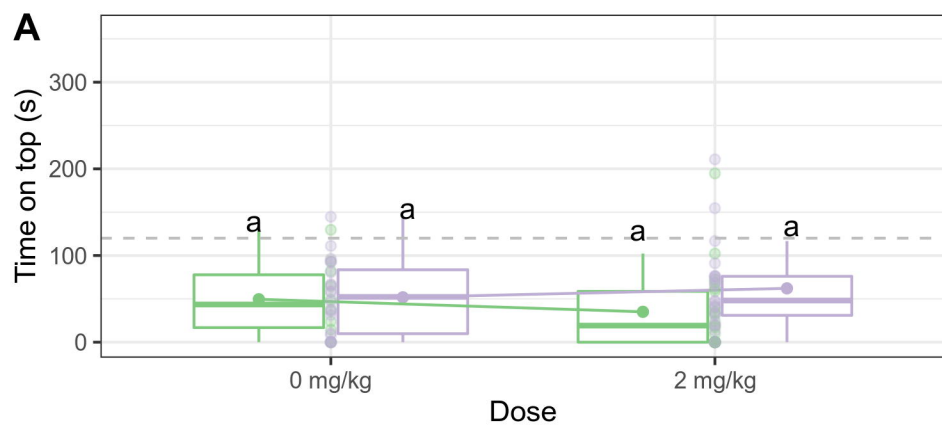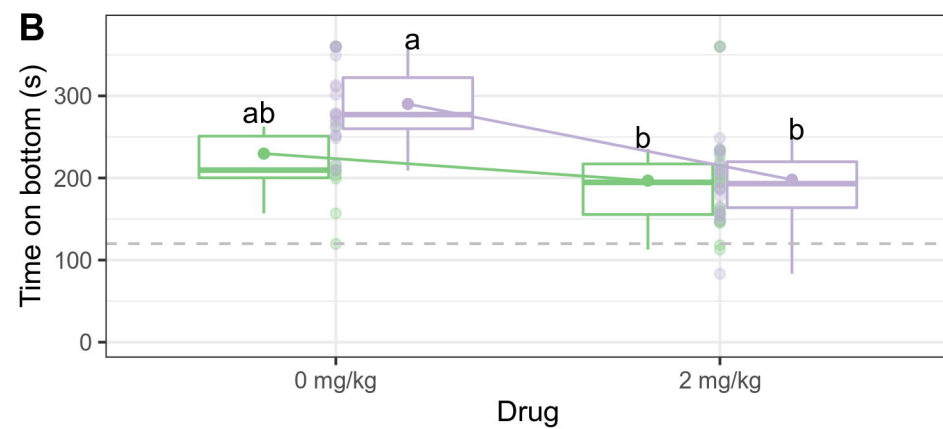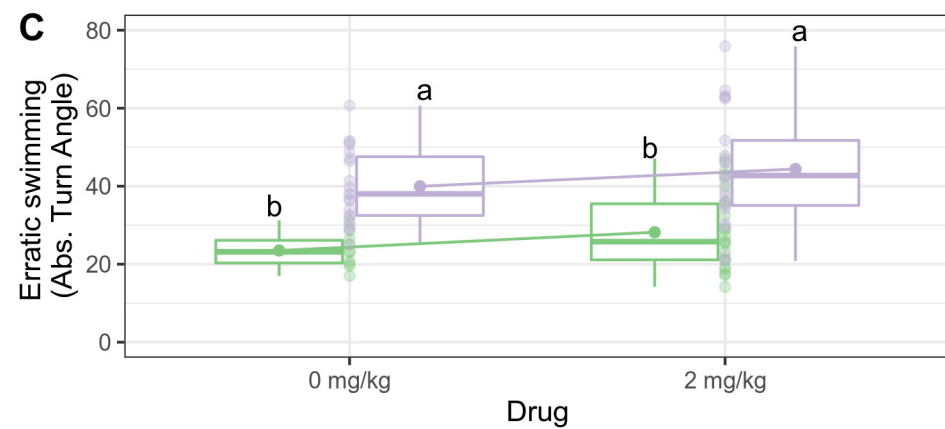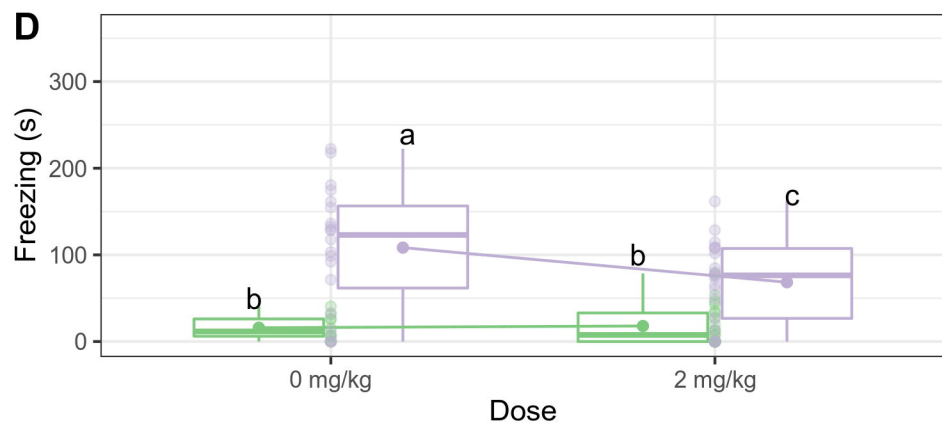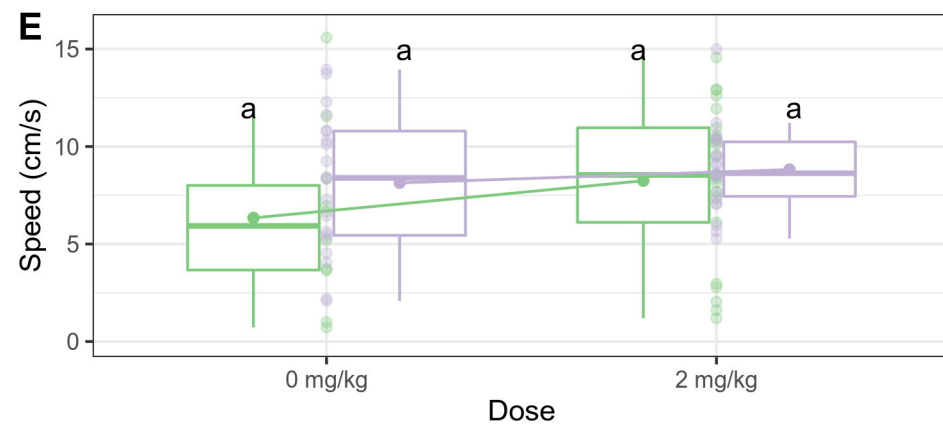

Treatment CTRL CAS

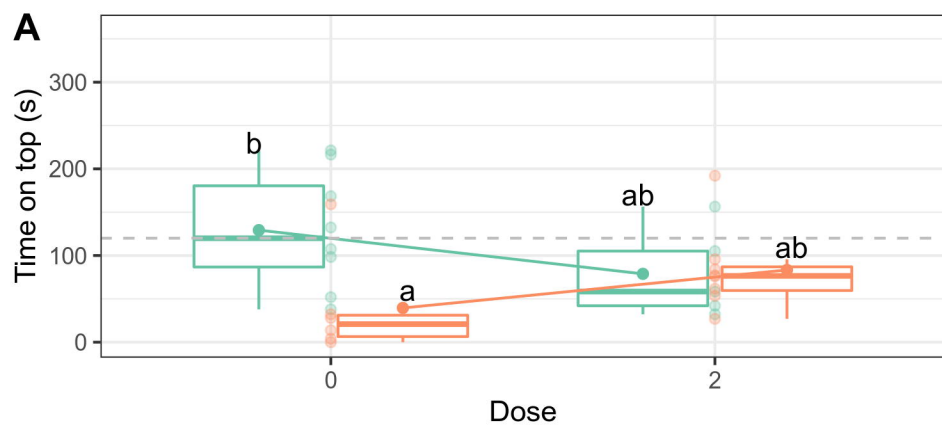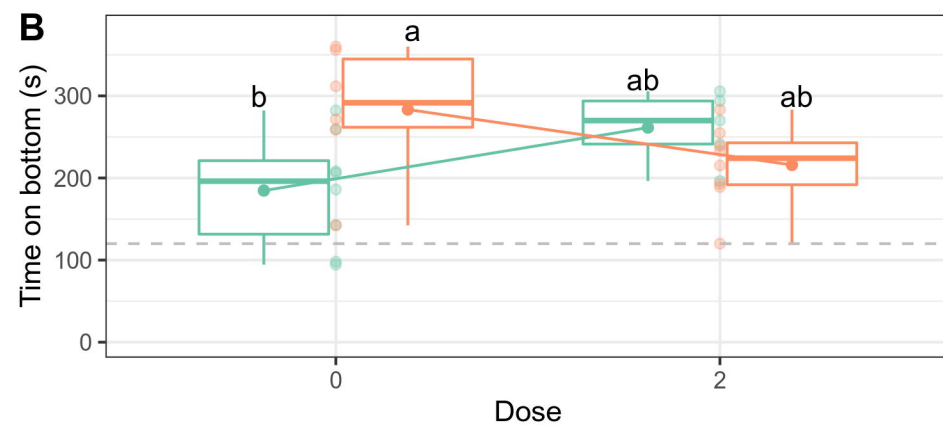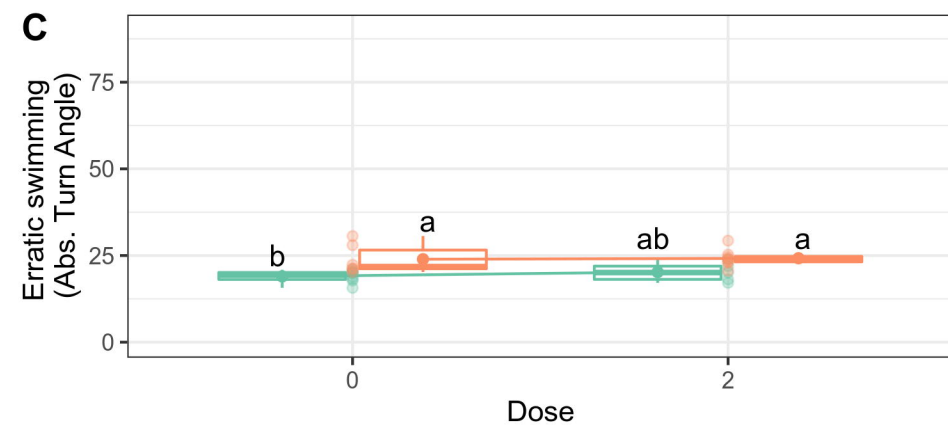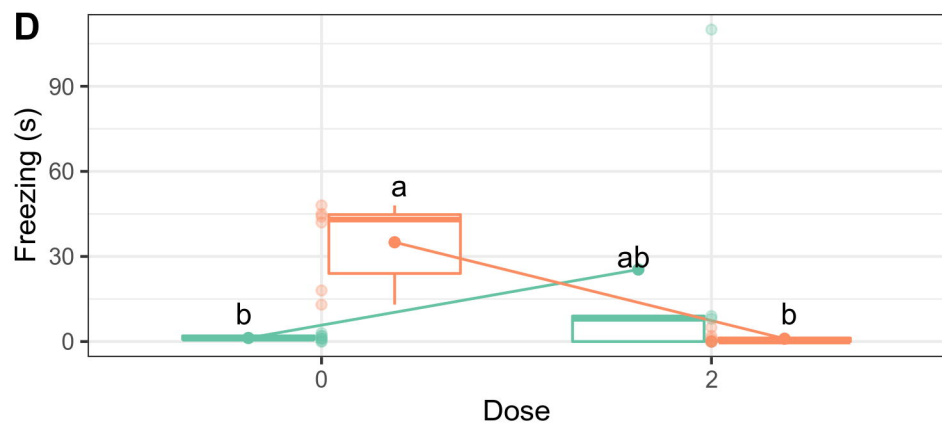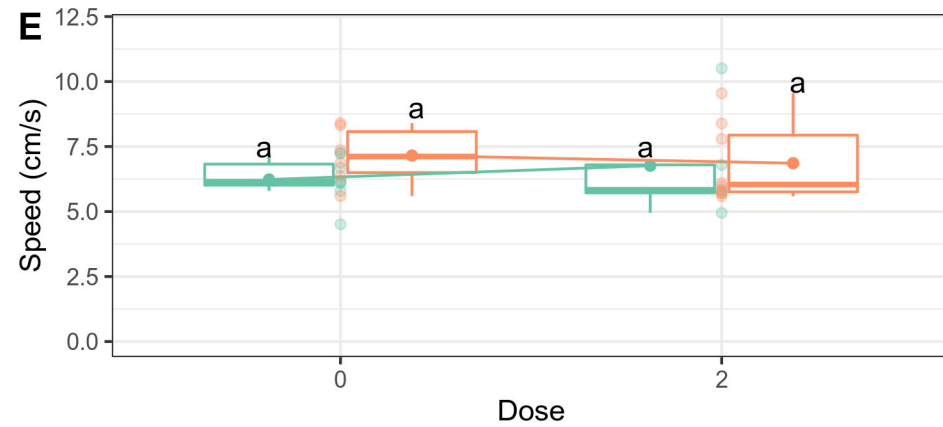

Treatment CTRL ARS
